# Supplementary material
Source: Research Square preprint supplement (doi:10.21203/rs.3.rs-10166827/v1)
Supplement: Supplementary file 1 [file e00f0cfe36de365d4d2eb2f0.pdf]

# CHERISH Supplementary Information

This file provides concise legends for supplementary figures and reviewer-facing tables that support the manuscript results and methods. The embedded supplementary tables focus on cohort denominators, validation metrics, biological-context analyses and statistical summaries.

## Contents

### Supplementary Figures

- Supplementary Fig. 1. Study cohort flow and endpoint denominators.
- Supplementary Fig. 2. Internal cross-validation of CHERISH supervisory levels.
- Supplementary Fig. 3. Locked external validation and reliability assessment.
- Supplementary Fig. 4. IHC 2+/FISH boundary use and review prioritization.
- Supplementary Fig. 5. MIL model comparison and component ablation.
- Supplementary Fig. 6. HoVerNet metric definitions and cellular evidence.
- Supplementary Fig. 7. Public spatial sample inclusion and spot QC.
- Supplementary Fig. 8. Public Visium spatial signal context.
- Supplementary Fig. 9. Gene-level and module evidence for spatial context.
- Supplementary Fig. 10. cell2location marker-expression support.
- Supplementary Fig. 11. Treatment-response and receptor-context assessment.
- Supplementary Fig. 12. Whole-slide attention and heatmap examples.

## Supplementary Tables

- Supplementary Table 1. Study cohort flow, eligibility criteria and endpoint-specific denominators.
- Supplementary Table 2. Validation lock and no-retuning record.
- Supplementary Table 3. Internal five-fold training cohort composition.
- Supplementary Table 4. Internal primary boundary-state fold-level performance and checkpoint selection.
- Supplementary Table 5. Pooled internal primary boundary-state out-of-fold summary.
- Supplementary Table 6. All-centre finalized external performance summary.
- Supplementary Table 7. External 1,410-case clinically matched H&E classifications.
- Supplementary Table 8. Centre-stratified cohort composition and final classification matrices.
- Supplementary Table 9. External IHC 2+/FISH boundary metric summary.
- Supplementary Table 10. Public TCGA image-level FISH-boundary test.
- Supplementary Table 11. External acquisition metadata availability and transportability boundary.
- Supplementary Table 12. Internal and external comparison with representative MIL baselines.
- Supplementary Table 13. Paired bootstrap AUC differences against MIL baselines.
- Supplementary Table 14. Component-removal ablation analysis.
- Supplementary Table 15. HoVerNet metric-definition and calculation dictionary.
- Supplementary Table 16. HoVerNet ordered HER2-spectrum metric summary.
- Supplementary Table 17. HoVerNet FISH-positive versus FISH-negative feature-evidence summary.
- Supplementary Table 18. Public spatial sample-selection summary.
- Supplementary Table 19. Public Visium inclusion and spot-denominator QC.
- Supplementary Table 20. Treatment-response and receptor-context assessment.
- Supplementary Table 21. pCR response-niche covariate-adjusted models.
- Supplementary Table 22. Positive-boundary review-alert summary across cohorts.
- Supplementary Table 23. Spatial transcriptomic module and cell-state source statistics.

## Supplementary Notes

Supplementary Note 1. Residual refinement and clinical-pathway base distribution.

Supplementary Note 2. Training provenance and effective sample accounting.

Supplementary Note 3. HoVerNet response-niche score derivation.

Supplementary Note 4. TCGA-BRCA HER2/IHC/FISH label curation.

# Supplementary Figures

## Supplementary Fig. 1

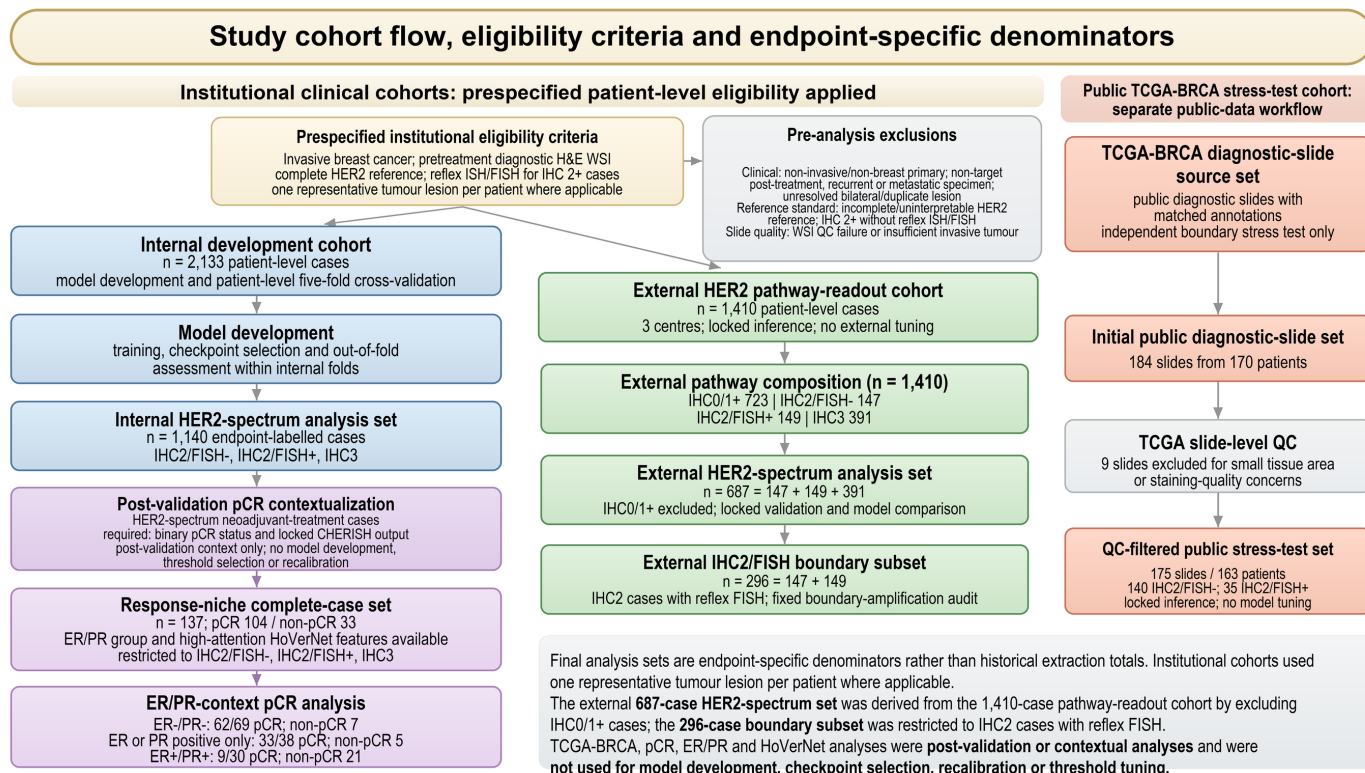

Supplementary Fig. 1

Supplementary Fig. 1 | Study cohort flow and endpoint denominators. Prespecified eligibility, exclusion categories and final analysis sets for the internal development cohort, external pathway-readout cohort, external positive-spectrum set, IHC 2+/FISH boundary subset, TCGA-BRCA stress-test set and pCR/HoVerNet context set.

## Supplementary Fig. 2

## Internal cross-validation audit of CHERISH supervisory levels

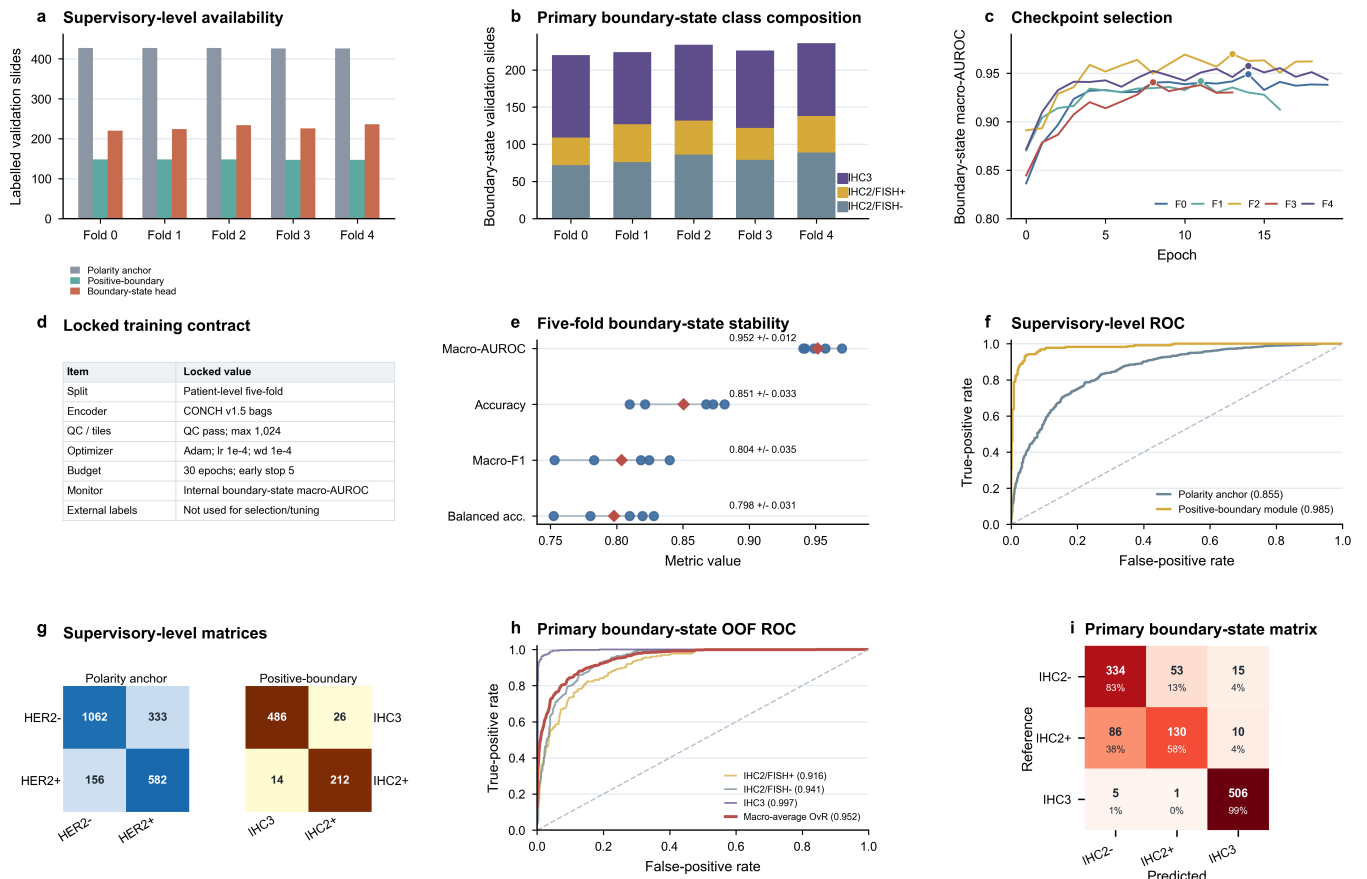

Panels use deidentified five-fold validation summaries and OOF predictions. The polarity anchor, positive-boundary module and primary boundary-state head are reported as ordered supervisory levels rather than independent clinical endpoints.

### Supplementary Fig. 2

Supplementary Fig. 2 | Internal cross-validation of CHERISH supervisory levels. Five-fold internal validation of the polarity anchor, positive-boundary module and primary boundary-state head, including fold composition, checkpoint selection and out-of-fold performance.

### Supplementary Fig. 3

Supplementary Fig. 3 | Locked external validation and reliability audit

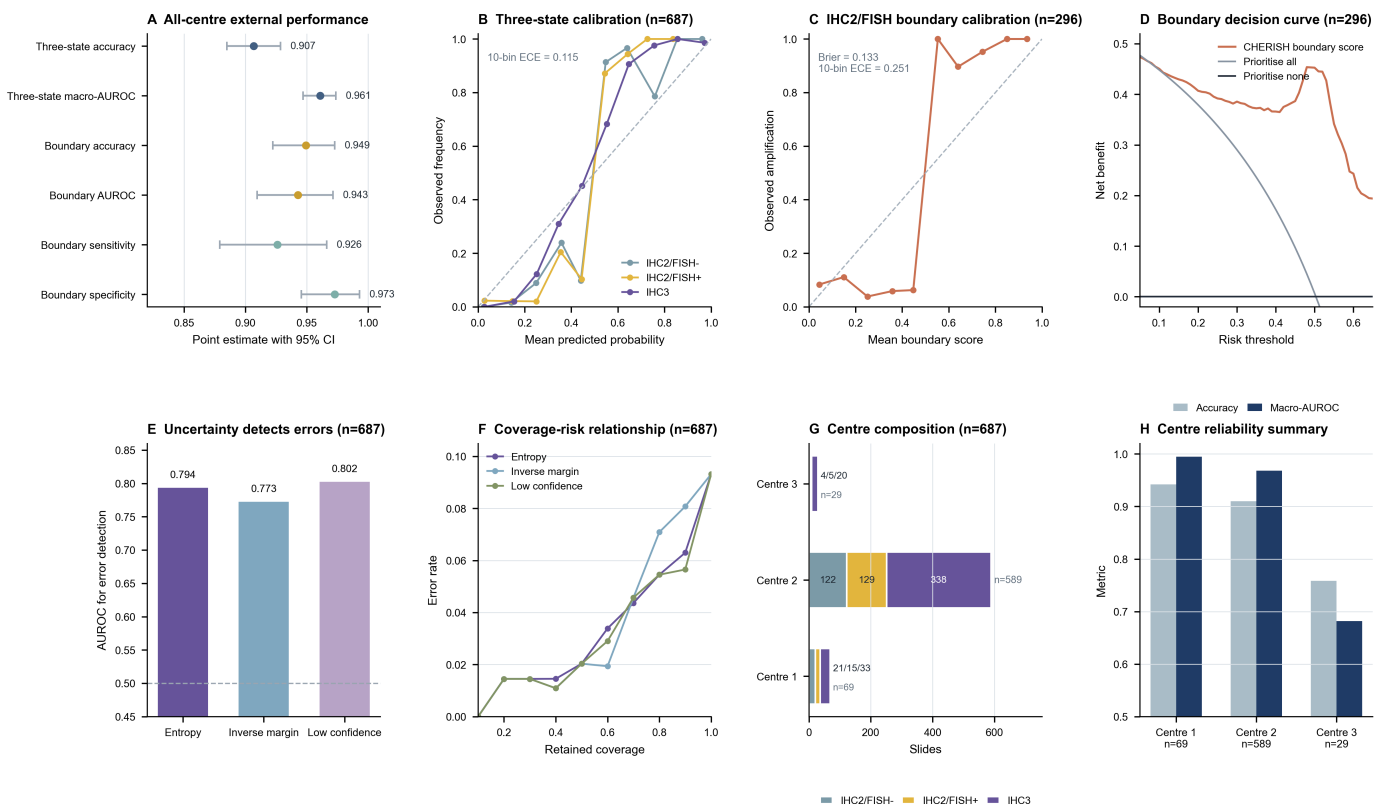

Supplementary Fig. 3

Supplementary Fig. 3 | Locked external validation and reliability assessment. External validation of the finalized model in the positive-spectrum and IHC 2+/FISH boundary analysis sets, with calibration, uncertainty and centre-level summaries.

Supplementary Fig. 4

Supplementary Fig. 4 | IHC2/FISH boundary-use and review-prioritization audit

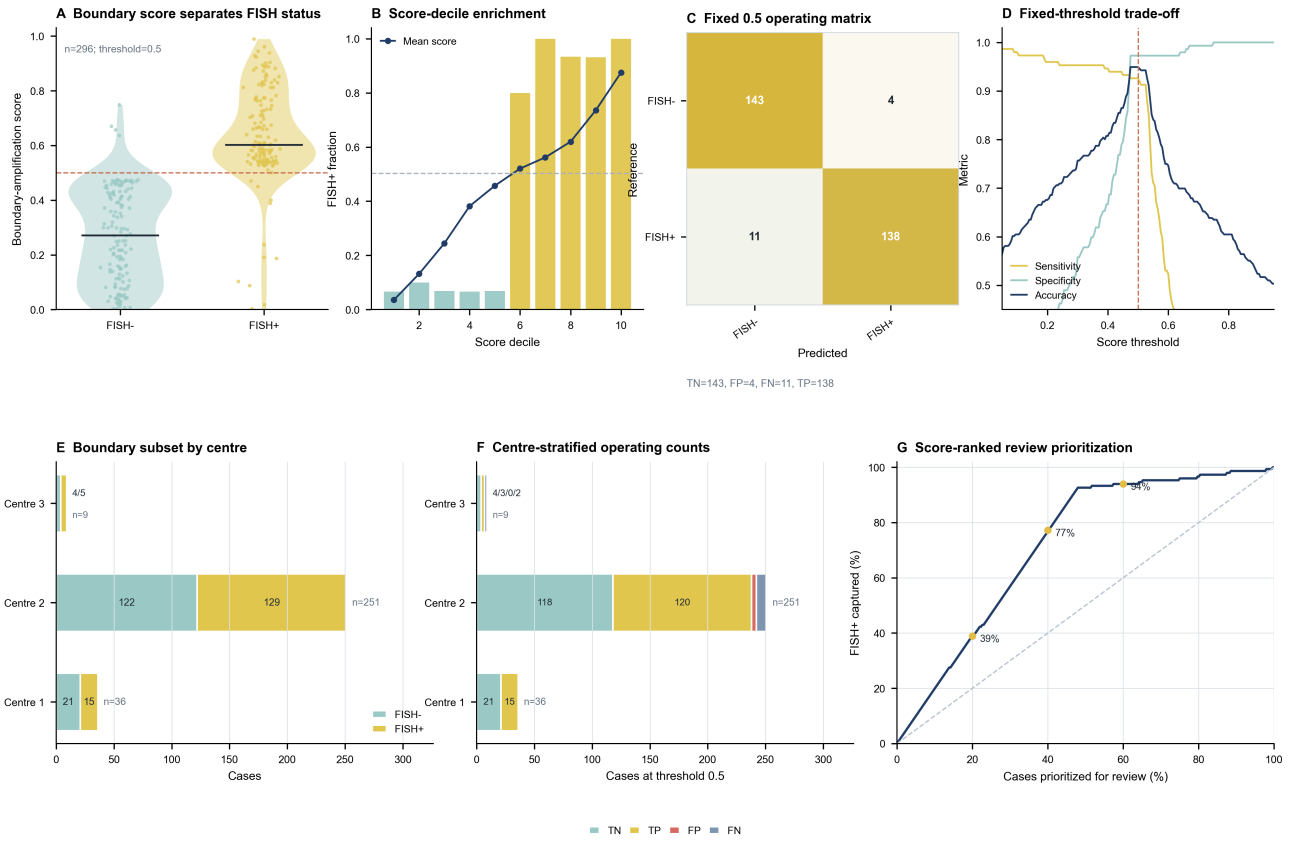

Supplementary Fig. 4

Supplementary Fig. 4 | IHC 2+/FISH boundary use and review prioritization. Fixed-threshold boundary-amplification assessment in the external IHC 2+ subset, centre-stratified operating counts and score-ranked review-prioritization analysis. Four-stratum external readout counts are reported in Fig. 1e, Table 1 and Supplementary Tables 7 and 8.

Supplementary Fig. 5

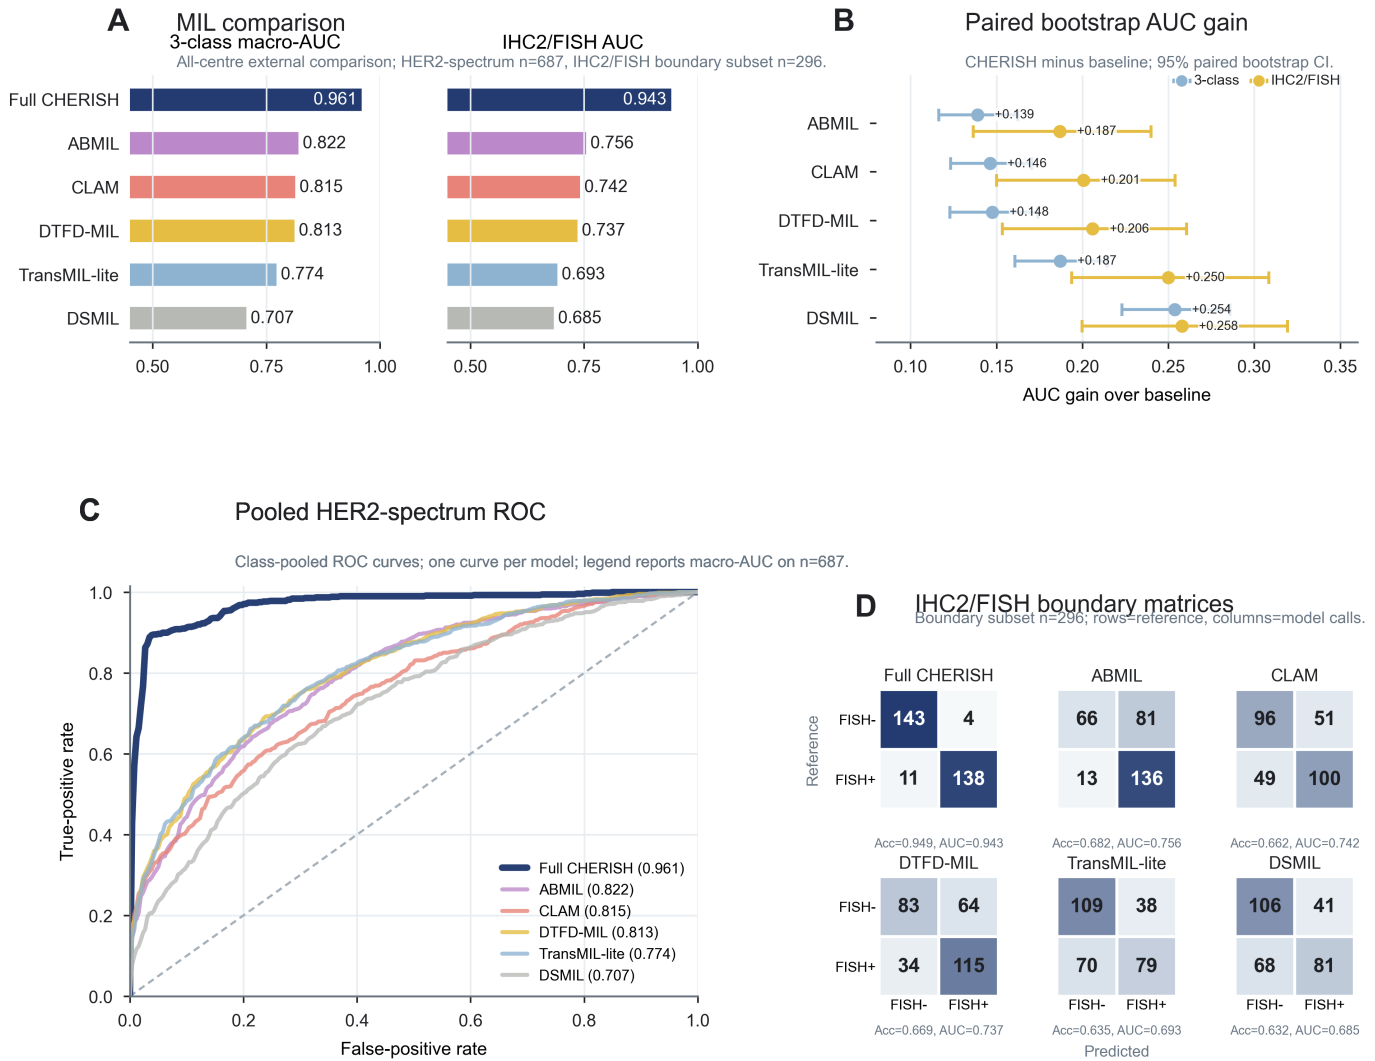

Supplementary Fig. 5

Supplementary Fig. 5 | MIL model comparison and component ablation. Matched comparison of CHERISH with representative MIL baselines and component-removal ablations using locked external denominators.

Supplementary Fig. 6

### A HoVerNet cohort and measurement layer

Post-validation tissue-state audit; cellular metrics were not used for CHERISH training or thresholding.

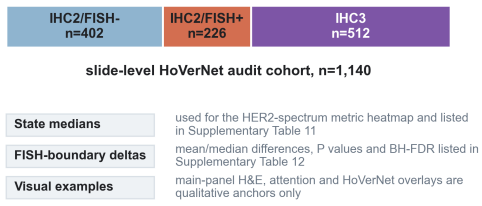

### B Supplementary expansion of main HoVerNet spectrum metrics

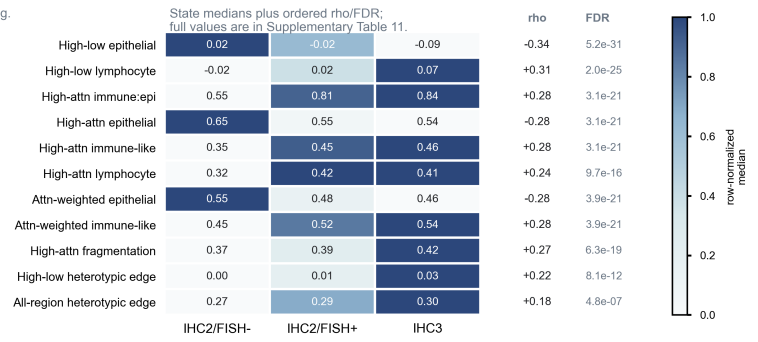

### C Detailed FISH+ versus FISH- differences for main-panel feature evidence

Raw units are listed here as a readable audit table; full means, medians, P values and FDR are in Supplementary Table 12.

| feature evidence                    | mean Δ | median Δ | BH-FDR  |
|-------------------------------------|--------|----------|---------|
| epithelial nuclear area CV          | +0.048 | +0.050   | 1.7e-15 |
| high-attention nuclear area         | -28.0  | -30.8    | 3.3e-14 |
| high-attention major axis           | -1.242 | -1.356   | 1.3e-12 |
| high-attention nuclear perimeter    | -3.405 | -3.621   | 7.5e-12 |
| fewer epithelial-only neighborhoods | -0.098 | -0.102   | 2.3e-11 |
| immune- interface axis              | +0.466 | +0.548   | 2.5e-11 |
| high-attention immune:epi ratio     | +0.409 | +0.266   | 1.8e-10 |
| high-attention epithelial fraction  | -0.099 | -0.095   | 1.8e-10 |
| attention-weighted immune:epi ratio | +0.469 | +0.319   | 2.4e-10 |
| high-attention lymphocyte fraction  | +0.096 | +0.096   | 7.5e-10 |

Ten strongest rows by full-audit rank are displayed; all 20 selected metrics are listed in Supplementary Table 12.

### D Feature-family summary for the expanded difference table

This panel summarizes Table 12 so the full numeric detail can stay in the table.

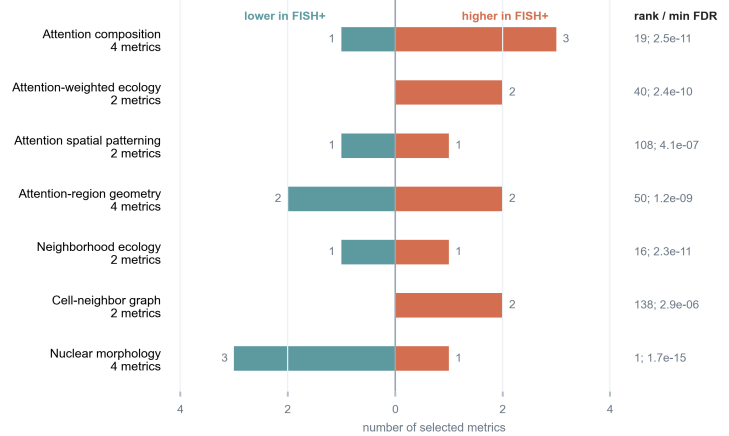

Supplementary tables provide the full numeric values for the HoVerNet differences summarized in the main figure.

### Supplementary Fig. 6

Supplementary Fig. 6 | HoVerNet metric definitions and cellular evidence. HoVerNet metric families and quantitative cellular evidence supporting the epithelial-immune interface interpretation of CHERISH-attended morphology.

### Supplementary Fig. 7

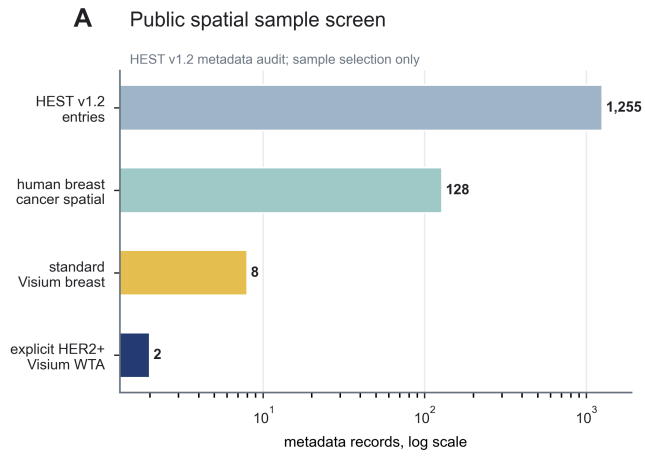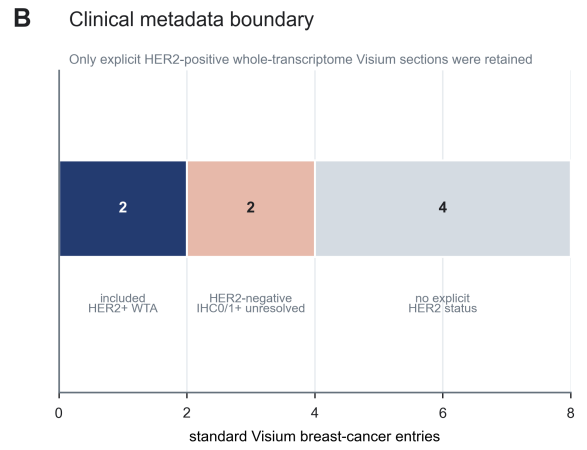

**C Assay and coverage rationale**

Assay families were audited but not pooled across incompatible readout layers

| candidate set                  | n  | gene layer            | tissue-spot layer             |
|--------------------------------|----|-----------------------|-------------------------------|
| Visium WTA<br>TENX13/TENX14    | 2  | WTA<br>33,538 genes   | 3,798/3,987<br>analysed spots |
| HER2+ Xenium<br>targeted panel | 3  | targeted<br>541 genes | not pooled                    |
| HER2+ older ST<br>candidates   | 36 | legacy ST<br>metadata | 176-712<br>spots under tissue |

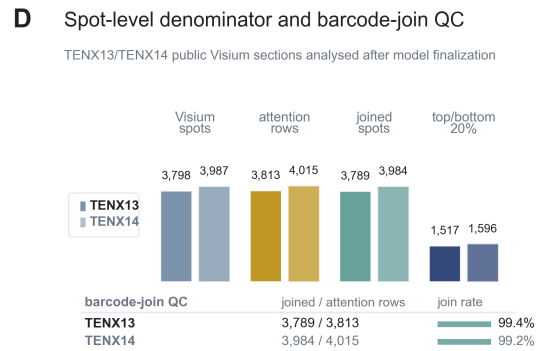

Sample selection is shown in panels A-C; spot denominators and barcode joining are summarized here.

Public spatial sections were selected and audited before tissue-state signal analysis; raw HEST data are not redistributed.

**Supplementary Fig. 7**

Supplementary Fig. 7 | Public spatial sample inclusion and spot QC. Selection of public HEST/10x Visium HER2-positive breast-cancer samples and spot/barcode denominator checks for TENX13 and TENX14.

**Supplementary Fig. 8**

### A Analysis boundary for spatial signal context

Public spatial sections were used for tissue-state context, not endpoint adjudication

|                     |                                                                                                                               |
|---------------------|-------------------------------------------------------------------------------------------------------------------------------|
| <b>Retained</b>     | TENX13/TENX14: public HER2-positive standard Visium WTA sections with adequate tissue coverage.                               |
| <b>Excluded</b>     | HER2-negative Visium entries lacked IHC0 versus IHC1+ resolution and were not suitable boundary-state controls.               |
| <b>Not pooled</b>   | HER2-positive Xenium and older Spatial Transcriptomics candidates used different gene-panel or spot-density layers.           |
| <b>Context only</b> | Spatial results support post-validation tissue-state context for high-attention morphology, not same-patient FISH validation. |

### B HER2-neighborhood modules increase in high-attention spots

Top/bottom attention contrasts in public HER2+ Visium sections

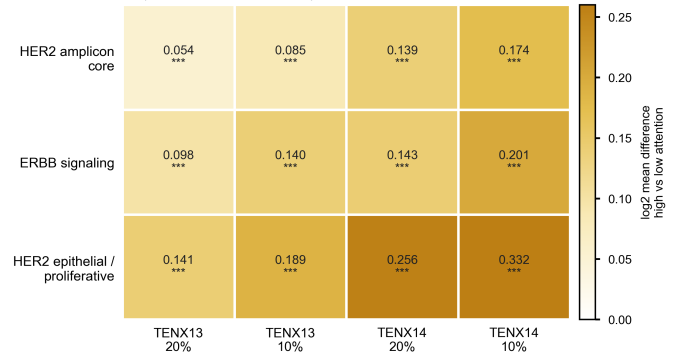

### C Whole-transcriptome programs follow the attention axis

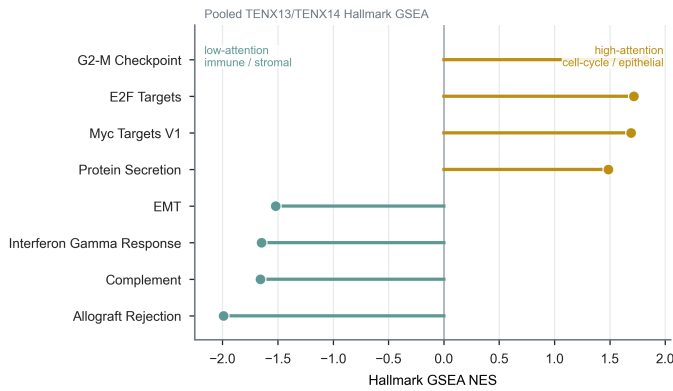

### D Reference cell-state context supports epithelial attention

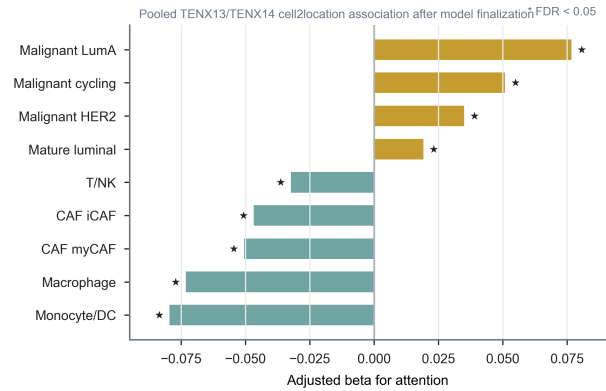

Spatial analyses were conducted after model finalization and public-section inclusion/QC; they provide tissue-state context, not FISH adjudication.

### Supplementary Fig. 8

Supplementary Fig. 8 | Public Visium spatial signal context. Spatial transcriptomic contrasts linking CHERISH high-attention regions to HER2-neighborhood, proliferation and cell-state readouts in TENX13/TENX14.

### Supplementary Fig. 9

HES-2-selected ER+/PR-/HER2+ public Visium sections; selected genes and pre-specified modules audit the source-data basis for the spatial tissue-state interpretation.

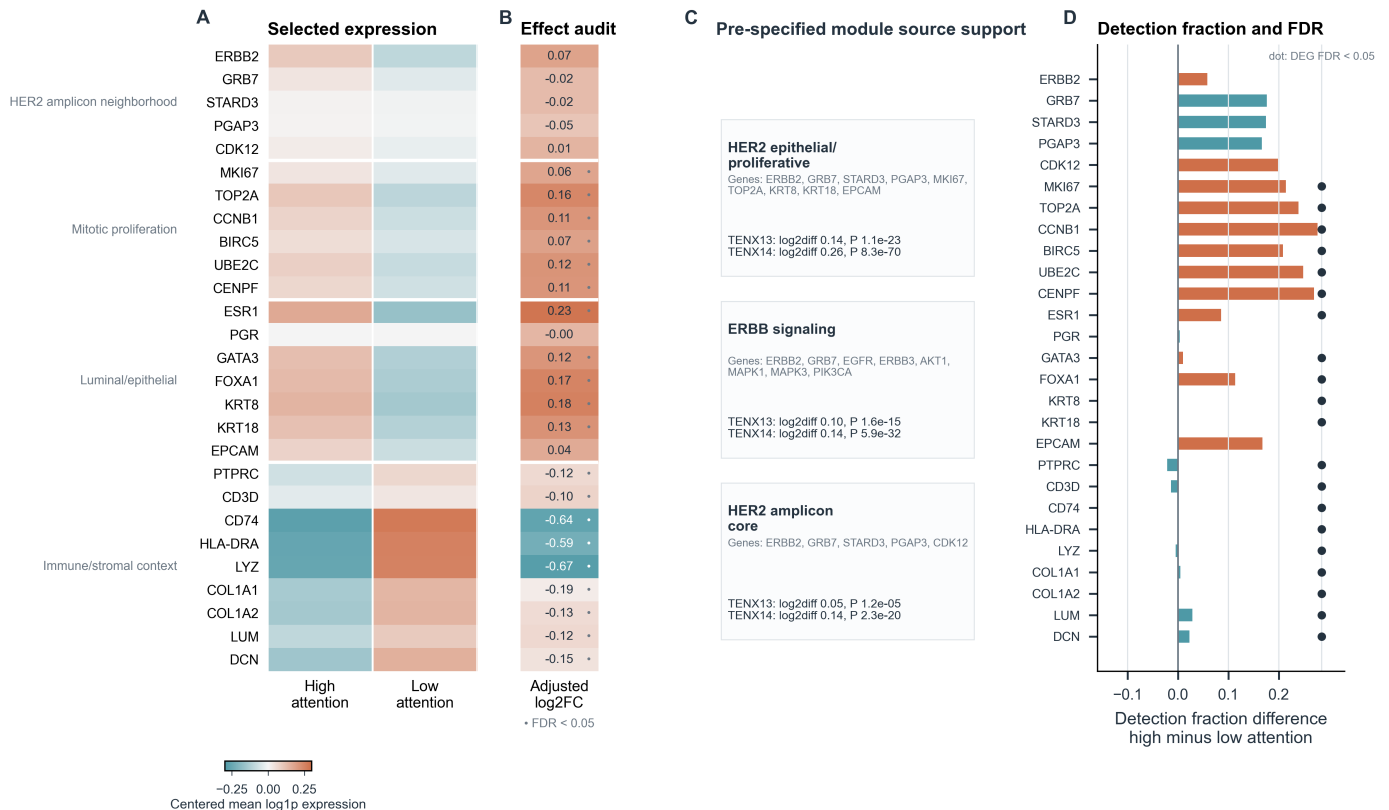

### Supplementary Fig. 9

Supplementary Fig. 9 | Gene-level and module evidence for spatial context. Gene-level and module-level checks supporting the spatial transcriptomic interpretation of high-attention regions.

## Supplementary Fig. 10

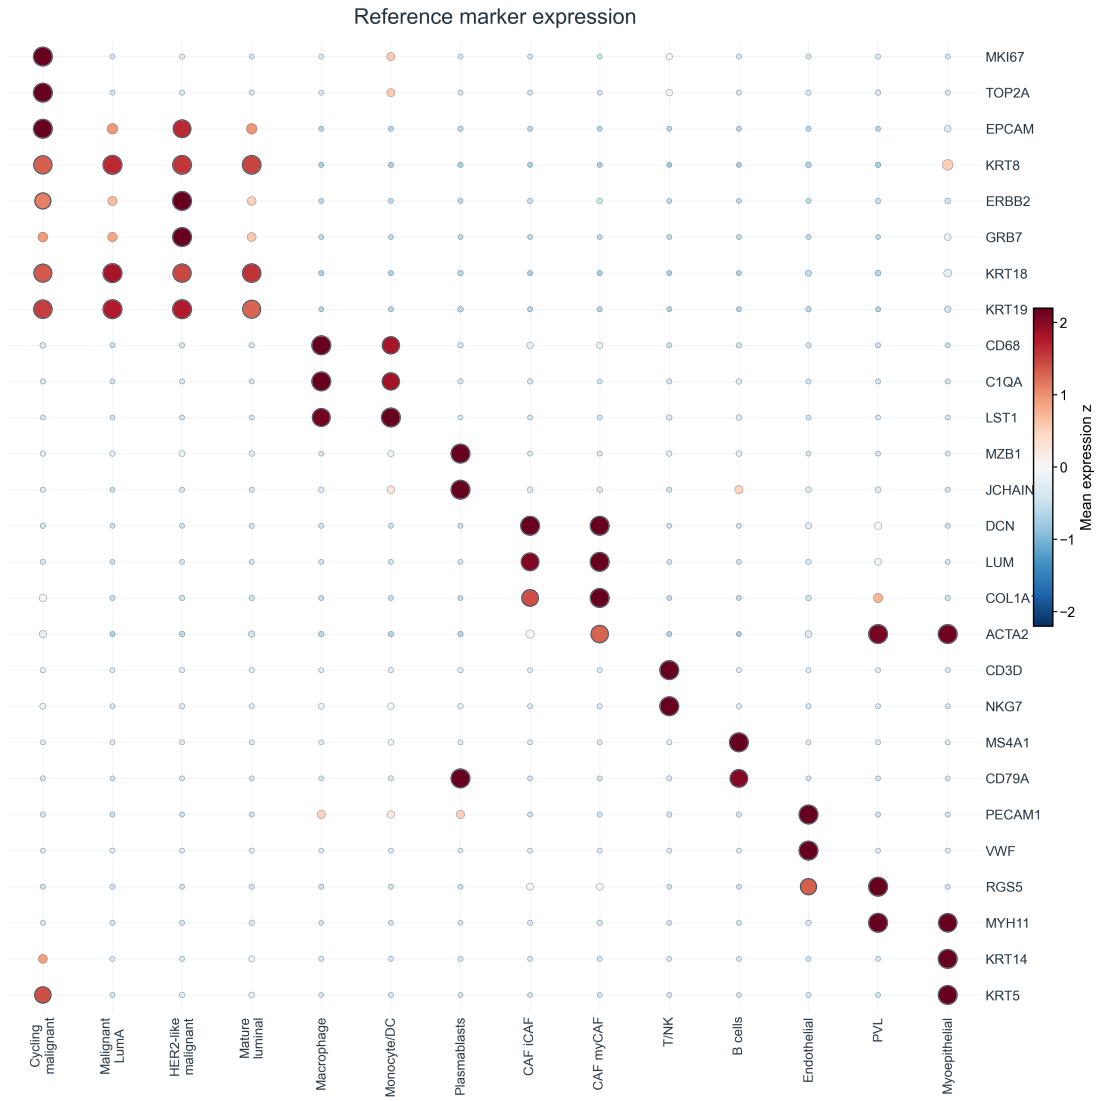

Color shows within-marker log<sub>1p</sub>-expression z-score across reference cell states; point area shows relative log<sub>1p</sub> expression.

Marker profiles audit reference cell-state labels used for post-lock spatial contextualization, not FISH adjudication.

### Supplementary Fig. 10

Supplementary Fig. 10 | cell2location marker-expression support. Reference marker-expression profiles used to interpret malignant epithelial, cycling, immune and stromal cell-state estimates.

## Supplementary Fig. 11

### A pCR increases along the HER2-testing spectrum

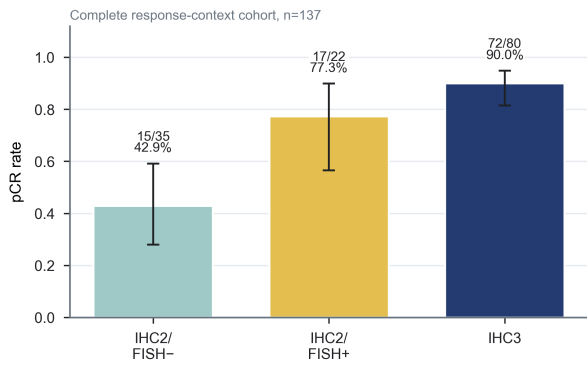

### B ER/PR retention aligns with attenuated morphology

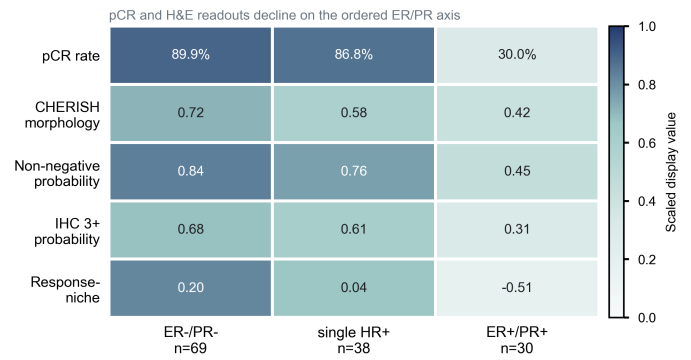

### C Response-associated tissue-state features

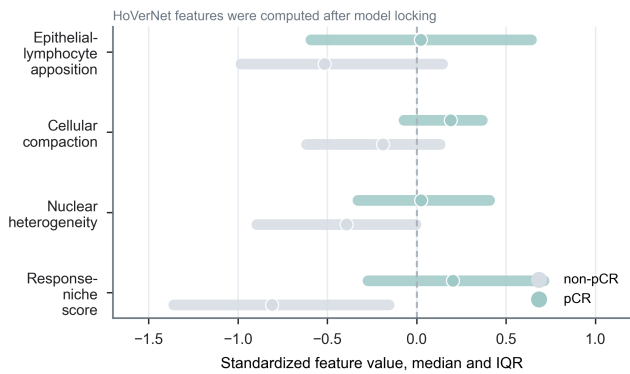

All analyses used finalized CHERISH outputs and post-validation context data; pCR and ER/PR labels were not used for CHERISH training, checkpoint selection or threshold tuning.

### D Exploratory response-context information

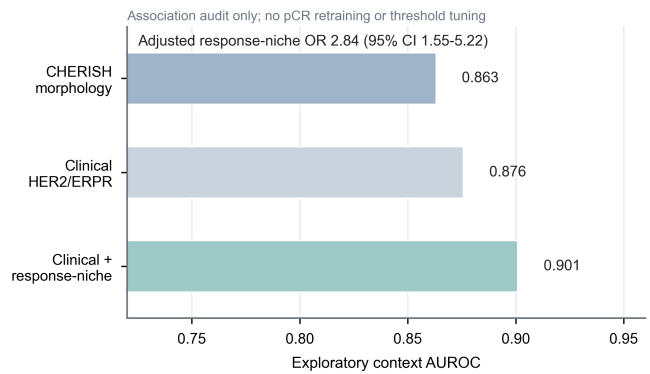

Supplementary Fig. 11

Supplementary Fig. 11 | Treatment-response and receptor-context assessment. Post-lock pCR, response-niche and ER/PR receptor-context analyses in the response-follow-up cohort.

### Supplementary Fig. 12

#### A Internal validation whole-slide attention maps

Original exported six model attention-map plate; qualitative localization example only.

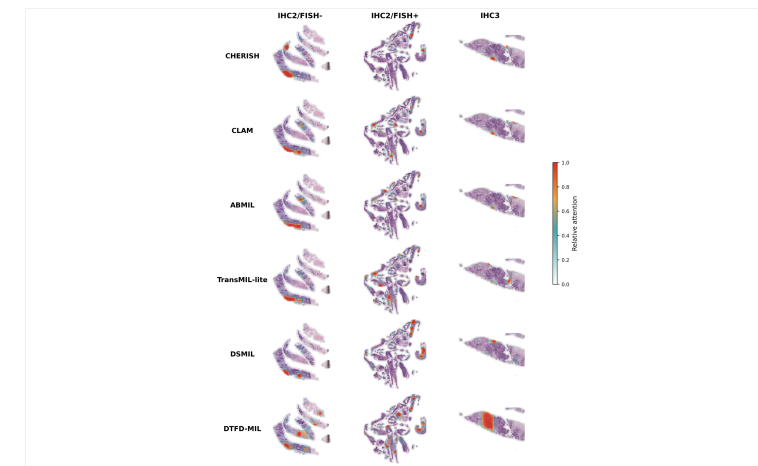

Original exported image material imported directly; quantitative claims are supported by the audit figures and source data.

### B Locked-external whole-slide attention maps

Original exported six model attention-map plate from the external comparison set.

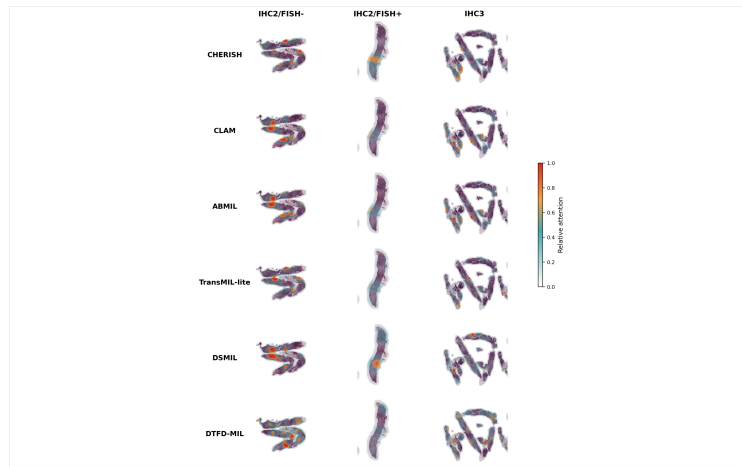

Original exported image material imported directly; quantitative claims are supported by the audit figures and source data.

### C Internal surgery and public TCGA attention heatmaps

Original exported surgery/TCGA heatmap material; public TCGA examples are image-level qualitative context.

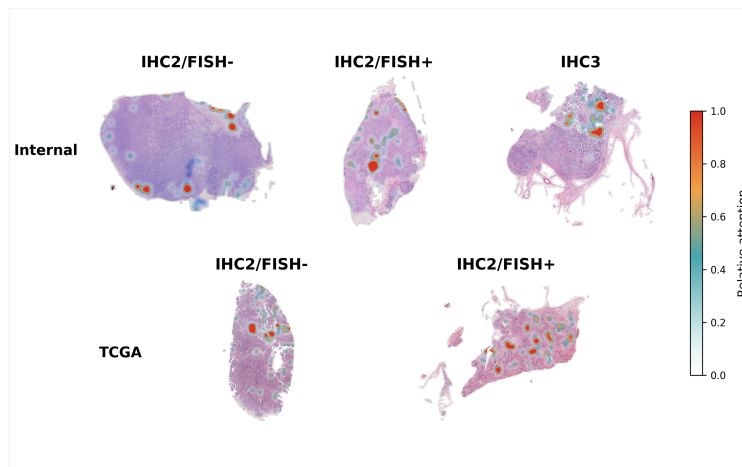

Original exported image material imported directly; quantitative claims are supported by the audit figures and source data.

Supplementary Fig. 12 | Whole-slide attention and heatmap examples. Representative qualitative CHERISH attention maps from internal, external, surgery and public TCGA examples. Quantitative interpretation is provided in the corresponding HoVerNet, spatial, pCR and review-alert analyses.

## Supplementary Tables

Supplementary Tables 1-23 are embedded in full in the accompanying reviewer-facing SI PDF and retained as the source workbook `CHERISH_Supplementary_Tables.xlsx`. The concise index below defines the role of each result-supporting table.

### **Supplementary Table 1. Study cohort flow, eligibility criteria and endpoint-specific denominators.**

Defines the analysis denominators used throughout the manuscript, including the internal development cohort, external 1,410-case readout cohort, external 687-case positive-spectrum set, IHC 2+/FISH boundary subset, TCGA-BRCA stress-test set and pCR/HoVerNet context set. The machine-readable table contains 7 data rows and 4 columns.

### **Supplementary Table 2. Validation lock and no-retuning record.**

Documents the separation between model development, model/classification locking, external validation and post-validation biological-context analyses. The machine-readable table contains 4 data rows and 7 columns.

### **Supplementary Table 3. Internal five-fold training cohort composition.**

Summarizes patient-level fold composition for the internal five-fold development split. The machine-readable table contains 5 data rows and 5 columns.

### **Supplementary Table 4. Internal primary boundary-state fold-level performance and checkpoint selection.**

Reports fold-level primary boundary-state performance and checkpoint-selection information. The machine-readable table contains 5 data rows and 11 columns.

### **Supplementary Table 5. Pooled internal primary boundary-state out-of-fold summary.**

Reports pooled out-of-fold internal primary boundary-state metrics, confusion rows and bootstrap confidence intervals for internal AUROC summaries. The machine-readable table contains 13 data rows and 5 columns.

### **Supplementary Table 6. All-centre finalized external performance summary.**

Reports the all-centre external positive-spectrum and IHC 2+/FISH boundary performance estimates with confidence intervals. The machine-readable table contains 10 data rows and 8 columns.

### **Supplementary Table 7. External 1,410-case clinically matched H&E classifications.**

Reports external four-stratum clinically matched H&E readouts in the 1,410-case cohort. The machine-readable table contains 6 data rows and 7 columns.

### **Supplementary Table 8. Centre-stratified cohort composition and final classification matrices.**

Provides centre-stratified reference-state composition and final classification matrices. The machine-readable table contains 12 data rows and 8 columns.

### **Supplementary Table 9. External IHC 2+/FISH boundary metric summary.**

Reports the fixed-threshold IHC 2+/FISH boundary metrics in the external 296-case subset. The machine-readable table contains 1 data row and 22 columns.

### **Supplementary Table 10. Public TCGA image-level FISH-boundary test.**

Reports the public TCGA-BRCA image-level FISH-boundary stress-test metrics after slide-level QC. The machine-readable table contains 1 data row and 20 columns.

### **Supplementary Table 11. External acquisition metadata availability and transportability boundary.**

Summarizes external acquisition-metadata visibility and transportability boundaries. The machine-readable table contains 4 data rows and 6 columns.

### **Supplementary Table 12. Internal and external comparison with representative MIL baselines.**

Reports matched internal and external performance for CHERISH and representative MIL baselines. The machine-readable table contains 6 data rows and 8 columns.

### **Supplementary Table 13. Paired bootstrap AUC differences against MIL baselines.**

Reports paired bootstrap AUC differences between CHERISH and MIL baselines. The machine-readable table contains 5 data rows and 12 columns.

### **Supplementary Table 14. Component-removal ablation analysis.**

Reports component-removal ablations used to localize the contribution of the hierarchy and residual-refinement modules. The machine-readable table contains 7 data rows and 14 columns.

### **Supplementary Table 15. HoVerNet metric-definition and calculation dictionary.**

Defines HoVerNet, attention-region, neighbourhood and response-niche metrics used for biological interpretation. The machine-readable table contains 22 data rows and 6 columns.

### **Supplementary Table 16. HoVerNet ordered HER2-spectrum metric summary.**

Reports selected HoVerNet metrics following the ordered HER2-spectrum gradient. The machine-readable table contains 11 data rows and 14 columns.

### **Supplementary Table 17. HoVerNet FISH-positive versus FISH-negative feature-evidence summary.**

Reports selected FISH-positive versus FISH-negative HoVerNet feature evidence in IHC 2+ cases. The machine-readable table contains 24 data rows and 15 columns.

**Supplementary Table 18. Public spatial sample-selection summary.**

Summarizes public spatial sample selection from HEST v1.2. The machine-readable table contains 6 data rows and 6 columns.

**Supplementary Table 19. Public Visium inclusion and spot-denominator QC.**

Reports TENX13/TENX14 Visium inclusion, spot and join denominators. The machine-readable table contains 2 data rows and 11 columns.

**Supplementary Table 20. Treatment-response and receptor-context assessment.**

Reports pCR, ER/PR receptor-context, CHERISH morphology-score and Wilson/Fisher statistical summaries in the response-follow-up cohort. The machine-readable table contains 21 data rows and 6 columns.

**Supplementary Table 21. pCR response-niche covariate-adjusted models.**

Reports pCR response-niche logistic models and covariate-adjusted sensitivity analyses. The machine-readable table contains 5 data rows and 10 columns.

**Supplementary Table 22. Positive-boundary review-alert summary across cohorts.**

Reports positive-boundary support among initially undercalled FISH-amplified cases in internal, external and TCGA cohorts. The machine-readable table contains 3 data rows and 7 columns.

**Supplementary Table 23. Spatial transcriptomic module and cell-state source statistics.**

Reports reviewer-facing statistics for public Visium spatial module contrasts, cell2location high-versus-low attention cell-state contrasts, continuous attention-cell-state associations and marker/module concordance supporting Fig. 4. The machine-readable table contains 34 data rows and 12 columns.

## Supplementary Notes

Supplementary Note 1. Residual refinement and clinical-pathway base distribution. For slide  $i$ , the intermediate pathway modules define a three-element clinical-pathway base distribution  $b_i$  over IHC 2+/FISH-negative, IHC 2+/FISH-amplified and IHC 3+ states. The morphology residual branch outputs a three-dimensional residual logit vector  $r_i$ , and final state logits are computed as  $\log(\text{clip}(b_i, \text{epsilon}, 1)) + r_i$ . When the residual branch contributes no additional morphology information, the prediction degenerates to the structured clinical-pathway base distribution. The residual branch therefore refines, rather than replaces, the clinical-pathway prior.

Supplementary Note 2. Training provenance and effective sample accounting. The full CHERISH training configuration, fold-level effective sample counts, checkpoint-selection summaries, ROC/calibration source tables and deidentified epoch summaries are retained in the controlled source-data archive and summarized in Supplementary Fig. 2 and Supplementary Tables 3-5. These files document the patient-level five-fold split, tile budget, loss weights, hierarchy-loss schedule, optimizer settings and validation endpoint used for checkpoint selection. Raw slide identifiers, patient identifiers, institution-specific feature-bag references and checkpoint binaries are not redistributed.

Supplementary Note 3. HoVerNet response-niche score derivation. The response-niche score was defined as the arithmetic mean of three slide-level z-scored high-attention HoVerNet features: epithelial-lymphocyte apposition, local cellular compaction and epithelial nuclear heterogeneity. The z-score transformation was fit within the complete pCR biological-context analysis set before logistic regression. Descriptive summaries, bootstrap intervals and multivariable sensitivity models are summarized in the Supplementary Tables; extended source tables are retained in the controlled source-data archive for the journal checklist or final source-data stage.

Supplementary Note 4. TCGA-BRCA HER2/IHC/FISH label curation. HER2/IHC/FISH labels for the public TCGA-BRCA stress-test cohort were abstracted from GDC-accessible pathology reports and phenotype annotations. Case-level and slide-level records were harmonized, available IHC scores, FISH amplification calls, HER2/CEP17 ratio and copy-number information were extracted where reported, and locked slide-level boundary labels were generated through scripted filtering followed by manual review. This public cohort was used as an independent image-level stress test under heterogeneous public-data conditions.

Controlled Source-Data Archive 4. Biological-context source data. Contains HoVerNet source tables and metric definitions, pCR/ERPR context tables, receptor-context summaries, TCGA image-level FISH-boundary summaries, HEST sample-selection summaries and spatial transcriptomic source tables.

## Supplementary Table 1. Cohort composition and main diagnostic endpoints.

Source workbook: Table 1; 7 data rows and 4 columns.

| analysis set                                                                  | role                                                                                        | n                         | reference composition                                                                                                                          |
|-------------------------------------------------------------------------------|---------------------------------------------------------------------------------------------|---------------------------|------------------------------------------------------------------------------------------------------------------------------------------------|
| Internal development cohort                                                   | Model development and patient-level five-fold cross-validation                              | 2,133                     | Patient-level invasive breast cancer cases with available diagnostic H&E WSI and eligible clinical HER2 reference information                  |
| Internal HER2-positive-spectrum analysis set                                  | Internal out-of-fold validation of the primary HER2 testing-pathway boundary-state endpoint | 1,140                     | IHC2/FISH-; IHC2/FISH+; IHC3 endpoint-labelled cases                                                                                           |
| External HER2 pathway-readout cohort                                          | Clinical-facing H&E readout assessment under locked inference                               | 1,410                     | IHC0/1+ 723; IHC2/FISH- 147; IHC2/FISH+ 149; IHC3 391                                                                                          |
| All-centre external HER2-positive-spectrum validation/model-comparison cohort | Locked three-state validation, reliability assessment and model comparison                  | 687                       | IHC2/FISH- 147; IHC2/FISH+ 149; IHC3 391                                                                                                       |
| External IHC2/FISH boundary subset                                            | Conditional fixed-threshold boundary-amplification assessment                               | 296                       | FISH non-amplified 147; FISH amplified 149                                                                                                     |
| Public TCGA-BRCA stress-test set                                              | Independent public boundary stress test after slide-level QC                                | 175 slides / 163 patients | IHC2/FISH- 140 slides; IHC2/FISH+ 35 slides                                                                                                    |
| pCR/HoVerNet response-niche complete-case set                                 | Post-validation biological-context analysis                                                 | 137                       | pCR 104; non-pCR 33; restricted to IHC2/FISH-, IHC2/FISH+ and IHC3 cases with ER/PR group, CHERISH output and high-attention HoVerNet features |

## Supplementary Table 2. Detailed internal development cohort composition.

Source workbook: Table 2; 4 data rows and 7 columns.

| validation item                          | cohort / step                                                    | n     | permitted use                                                                      | finalized before next step | external labels used for tuning | manuscript role                                    |
|------------------------------------------|------------------------------------------------------------------|-------|------------------------------------------------------------------------------------|----------------------------|---------------------------------|----------------------------------------------------|
| Model and classification finalization    | Final CHERISH estimator and prespecified classification formulas |       | Freeze neural-network outputs and deterministic classification layer               | Yes                        | No                              | Prevents post-hoc threshold or classifier retuning |
| Clinical-facing external classifications | External HER2 pathway-readout cohort                             | 1,410 | Evaluate clinically matched H&E readouts across HER2 clinical questions            | Yes                        | No                              | External clinical readout alignment                |
| All-centre locked validation             | External HER2-positive-spectrum validation cohort                | 687   | Evaluate the finalized three-state endpoint and reliability behaviour              | Yes                        | No                              | Primary all-centre external validation             |
| IHC2/FISH boundary subset                | External IHC2/FISH boundary subset                               | 296   | Evaluate the conditional boundary-amplification score and fixed 0.5 operating rule | Yes                        | No                              | Boundary-amplification assessment                  |

### Supplementary Table 3. Detailed external validation cohort composition.

Source workbook: Table 3; 5 data rows and 5 columns.

| validation fold | validation slides | Polarity-anchor labels                     | Positive-boundary labels      | Primary boundary-state labels                |
|-----------------|-------------------|--------------------------------------------|-------------------------------|----------------------------------------------|
| Fold 0          | 427               | 427 (HER2-negative 279; HER2-positive 148) | 148 (IHC3 111; IHC2/FISH+ 37) | 220 (IHC2/FISH- 72; IHC2/FISH+ 37; IHC3 111) |
| Fold 1          | 427               | 427 (HER2-negative 279; HER2-positive 148) | 148 (IHC3 97; IHC2/FISH+ 51)  | 224 (IHC2/FISH- 76; IHC2/FISH+ 51; IHC3 97)  |
| Fold 2          | 427               | 427 (HER2-negative 279; HER2-positive 148) | 148 (IHC3 102; IHC2/FISH+ 46) | 234 (IHC2/FISH- 86; IHC2/FISH+ 46; IHC3 102) |
| Fold 3          | 426               | 426 (HER2-negative 279; HER2-positive 147) | 147 (IHC3 104; IHC2/FISH+ 43) | 226 (IHC2/FISH- 79; IHC2/FISH+ 43; IHC3 104) |
| Fold 4          | 426               | 426 (HER2-negative 279; HER2-positive 147) | 147 (IHC3 98; IHC2/FISH+ 49)  | 236 (IHC2/FISH- 89; IHC2/FISH+ 49; IHC3 98)  |

### Supplementary Table 4. TCGA-BRCA cohort composition.

Source workbook: Table 4; 5 data rows and 11 columns.

| validation fold | validation slides | primary boundary-state slides | selected epoch | epochs reviewed | accuracy | macro-F1 | balanced accuracy | macro-AUROC | ECE (10 bins) | Brier score |
|-----------------|-------------------|-------------------------------|----------------|-----------------|----------|----------|-------------------|-------------|---------------|-------------|
| Fold 0          | 427               | 220                           | 14             | 20              | 0.8727   | 0.8245   | 0.8194            | 0.9490      | 0.0520        | 0.2047      |
| Fold 1          | 427               | 224                           | 11             | 17              | 0.8214   | 0.7829   | 0.7801            | 0.9419      | 0.0234        | 0.2257      |
| Fold 2          | 427               | 234                           | 13             | 19              | 0.8675   | 0.8183   | 0.8097            | 0.9698      | 0.0406        | 0.1736      |
| Fold 3          | 426               | 226                           | 8              | 14              | 0.8097   | 0.7531   | 0.7525            | 0.9407      | 0.0612        | 0.2379      |
| Fold 4          | 426               | 236                           | 14             | 20              | 0.8814   | 0.8399   | 0.8279            | 0.9574      | 0.0353        | 0.1796      |

## Supplementary Table 5. Full-spectrum HER2 reference-state distribution.

Source workbook: Table 5; 13 data rows and 5 columns.

| summary block                              | item                               | value                                            | denominator or counts                               | note                                             |
|--------------------------------------------|------------------------------------|--------------------------------------------------|-----------------------------------------------------|--------------------------------------------------|
| Pooled primary boundary-state OOF          | Denominator                        | n=1140; IHC2/FISH- 402; IHC2/FISH+ 226; IHC3 512 | Five-fold deidentified out-of-fold predictions      | Patient-level internal validation folds          |
| Pooled primary boundary-state OOF          | Accuracy                           | 0.8509                                           | n=1140; IHC2/FISH- 402; IHC2/FISH+ 226; IHC3 512    | Pooled across validation folds                   |
| Pooled primary boundary-state OOF          | Macro-F1                           | 0.8041                                           | n=1140; IHC2/FISH- 402; IHC2/FISH+ 226; IHC3 512    | Unweighted mean across the three boundary states |
| Pooled primary boundary-state OOF          | Balanced accuracy                  | 0.7981                                           | n=1140; IHC2/FISH- 402; IHC2/FISH+ 226; IHC3 512    | Mean class recall                                |
| Pooled primary boundary-state OOF          | Macro-AUROC                        | 0.9512                                           | n=1140; IHC2/FISH- 402; IHC2/FISH+ 226; IHC3 512    | One-vs-rest macro average                        |
| Pooled primary boundary-state OOF          | ECE (10 bins)                      | 0.0270                                           | n=1140; IHC2/FISH- 402; IHC2/FISH+ 226; IHC3 512    | Top-label calibration error                      |
| Pooled primary boundary-state OOF          | Brier score                        | 0.2038                                           | n=1140; IHC2/FISH- 402; IHC2/FISH+ 226; IHC3 512    | Multiclass probability score                     |
| Pooled confusion matrix                    | Reference IHC2/FISH-               | 83.1%                                            | IHC2/FISH- 334; IHC2/FISH+ 53; IHC3 15              | reference n=402                                  |
| Pooled confusion matrix                    | Reference IHC2/FISH+               | 57.5%                                            | IHC2/FISH- 86; IHC2/FISH+ 130; IHC3 10              | reference n=226                                  |
| Pooled confusion matrix                    | Reference IHC3                     | 98.8%                                            | IHC2/FISH- 5; IHC2/FISH+ 1; IHC3 506                | reference n=512                                  |
| Internal OOF bootstrap confidence interval | Polarity anchor AUROC              | 0.8544 (95% CI 0.8378-0.8706)                    | n=2133; 5,000 label-stratified bootstrap replicates | Derived summary value reported in this workbook. |
| Internal OOF bootstrap confidence interval | Positive-boundary module AUROC     | 0.9824 (95% CI 0.9729-0.9906)                    | n=738; 5,000 label-stratified bootstrap replicates  | Derived summary value reported in this workbook. |
| Internal OOF bootstrap confidence interval | Primary boundary-state macro-AUROC | 0.9512 (95% CI 0.9417-0.9598)                    | n=1140; 5,000 class-stratified bootstrap replicates | Derived summary value reported in this workbook. |

## Supplementary Table 6. External three-centre HER2-category performance.

Source workbook: Table 6; 10 data rows and 8 columns.

| endpoint                                       | metric            | n   | point estimate | 95% CI        | estimate (95% CI)      | confusion counts            | supporting source                                            |
|------------------------------------------------|-------------------|-----|----------------|---------------|------------------------|-----------------------------|--------------------------------------------------------------|
| HER2-positive-spectrum boundary-state endpoint | Accuracy          | 687 | 0.9068         | 0.8850-0.9287 | 0.9068 (0.8850-0.9287) |                             | Derived metric table and bootstrap confidence-interval table |
| HER2-positive-spectrum boundary-state endpoint | Balanced accuracy | 687 | 0.8909         | 0.8627-0.9172 | 0.8909 (0.8627-0.9172) |                             | Derived metric table and bootstrap confidence-interval table |
| HER2-positive-spectrum boundary-state endpoint | Macro-F1          | 687 | 0.8915         | 0.8649-0.9171 | 0.8915 (0.8649-0.9171) |                             | Derived metric table and bootstrap confidence-interval table |
| HER2-positive-spectrum boundary-state endpoint | Macro-AUROC       | 687 | 0.9610         | 0.9471-0.9737 | 0.9610 (0.9471-0.9737) |                             | Derived metric table and bootstrap confidence-interval table |
| IHC2/FISH amplification-boundary endpoint      | Accuracy          | 296 | 0.9493         | 0.9223-0.9730 | 0.9493 (0.9223-0.9730) | TN=143, FP=4, FN=11, TP=138 | Derived metric table and bootstrap confidence-interval table |
| IHC2/FISH amplification-boundary endpoint      | Balanced accuracy | 296 | 0.9495         | 0.9225-0.9731 | 0.9495 (0.9225-0.9731) | TN=143, FP=4, FN=11, TP=138 | Derived metric table and bootstrap confidence-interval table |
| IHC2/FISH amplification-boundary endpoint      | F1                | 296 | 0.9485         | 0.9204-0.9728 | 0.9485 (0.9204-0.9728) | TN=143, FP=4, FN=11, TP=138 | Derived metric table and bootstrap confidence-interval table |
| IHC2/FISH amplification-boundary endpoint      | AUROC             | 296 | 0.9429         | 0.9097-0.9715 | 0.9429 (0.9097-0.9715) | TN=143, FP=4, FN=11, TP=138 | Derived metric table and bootstrap confidence-interval table |
| IHC2/FISH amplification-boundary endpoint      | Sensitivity       | 296 | 0.9262         | 0.8792-0.9664 | 0.9262 (0.8792-0.9664) | TN=143, FP=4, FN=11, TP=138 | Derived metric table and bootstrap confidence-interval table |
| IHC2/FISH amplification-boundary endpoint      | Specificity       | 296 | 0.9728         | 0.9456-0.9932 | 0.9728 (0.9456-0.9932) | TN=143, FP=4, FN=11, TP=138 | Derived metric table and bootstrap confidence-interval table |

## Supplementary Table 7. Reference-state-specific external accuracy.

Source workbook: Table 7; 6 data rows and 7 columns.

| clinical question           | analysis set                          | classification used                                                     | matched / total | percent | 95% CI    | CI method/source                 |
|-----------------------------|---------------------------------------|-------------------------------------------------------------------------|-----------------|---------|-----------|----------------------------------|
| IHC 0/1+                    | Three-centre external HER2 cohort     | model-derived negative-side classification                              | 698/723         | 96.5%   | 94.9-97.6 | Wilson score interval            |
| IHC 2+/FISH-                | Three-centre external HER2 cohort     | boundary-amplification classification below the prespecified threshold  | 143/147         | 97.3%   | 93.2-98.9 | Wilson score interval            |
| IHC 2+/FISH+                | Three-centre external HER2 cohort     | boundary-amplification classification above the prespecified threshold  | 138/149         | 92.6%   | 87.3-95.8 | Wilson score interval            |
| IHC 3+                      | Three-centre external HER2 cohort     | model-derived strong-positive classification                            | 366/391         | 93.6%   | 90.7-95.6 | Wilson score interval            |
| IHC2/FISH boundary accuracy | IHC2/FISH subset in 1,410-case cohort | boundary-amplification classification at the prespecified 0.5 threshold | 281/296         | 94.9%   | 92.2-97.3 | 5,000 label-stratified bootstrap |
| IHC2/FISH boundary AUC      | IHC2/FISH subset in 1,410-case cohort | continuous conditional boundary-amplification score                     |                 | 0.9429  | 91.0-97.2 | 5,000 label-stratified bootstrap |

### Supplementary Table 8. External IHC 2+/FISH-boundary confusion and performance.

Source workbook: Table 8; 12 data rows and 8 columns.

| centre   | reference state | 0/1+ routed | FISH- within IHC2 | FISH+ within IHC2 | IHC3 recalled | matched / total | row percent |
|----------|-----------------|-------------|-------------------|-------------------|---------------|-----------------|-------------|
| Centre 1 | IHC 0/1+        | 63          | 1                 | 0                 | 3             | 63/67           | 94.0%       |
| Centre 1 | IHC 2+/FISH-    | 0           | 21                | 0                 | 0             | 21/21           | 100.0%      |
| Centre 1 | IHC 2+/FISH+    | 0           | 0                 | 15                | 0             | 15/15           | 100.0%      |
| Centre 1 | IHC 3+          | 0           | 0                 | 0                 | 33            | 33/33           | 100.0%      |
| Centre 2 | IHC 0/1+        | 588         | 0                 | 1                 | 16            | 588/605         | 97.2%       |
| Centre 2 | IHC 2+/FISH-    | 0           | 118               | 4                 | 0             | 118/122         | 96.7%       |
| Centre 2 | IHC 2+/FISH+    | 0           | 9                 | 120               | 0             | 120/129         | 93.0%       |
| Centre 2 | IHC 3+          | 0           | 6                 | 17                | 315           | 315/338         | 93.2%       |
| Centre 3 | IHC 0/1+        | 47          | 1                 | 1                 | 2             | 47/51           | 92.2%       |
| Centre 3 | IHC 2+/FISH-    | 0           | 4                 | 0                 | 0             | 4/4             | 100.0%      |
| Centre 3 | IHC 2+/FISH+    | 0           | 2                 | 3                 | 0             | 3/5             | 60.0%       |
| Centre 3 | IHC 3+          | 0           | 1                 | 1                 | 18            | 18/20           | 90.0%       |

### Supplementary Table 9. Internal development performance summary.

Source workbook: Table 9; 1 data rows and 22 columns.

| cohort                            | analysis subset   | n   | FISH non-amplified | FISH amplified | threshold | TN  | FP | FN | TP  | accuracy | accuracy 95% CI | AUC    | AUC 95% CI    | sensitivity | sensitivity 95% CI | specificity | specificity 95% CI | PPV    | NPV    | F1     | F1 95% CI     |
|-----------------------------------|-------------------|-----|--------------------|----------------|-----------|-----|----|----|-----|----------|-----------------|--------|---------------|-------------|--------------------|-------------|--------------------|--------|--------|--------|---------------|
| External three-centre HER2 cohort | IHC/FISH boundary | 296 | 147                | 149            | 0.500     | 143 | 4  | 11 | 138 | 0.9493   | 0.9223-0.9730   | 0.9429 | 0.9097-0.9715 | 0.9262      | 0.8792-0.9664      | 0.9728      | 0.9456-0.9932      | 0.9718 | 0.9286 | 0.9485 | 0.9204-0.9728 |

### Supplementary Table 10. TCGA-BRCA locked validation summary.

Source workbook: Table 10; 1 data rows and 20 columns.

| cohort                          | slides / patients | FISH non-amplified slides | FISH amplified slides | TN  | FP | FN | TP | accuracy | accuracy 95% CI | AUC    | AUC 95% CI    | sensitivity | sensitivity 95% CI | specificity | specificity 95% CI | PPV    | NPV    | F1     | F1 95% CI     |
|---------------------------------|-------------------|---------------------------|-----------------------|-----|----|----|----|----------|-----------------|--------|---------------|-------------|--------------------|-------------|--------------------|--------|--------|--------|---------------|
| Public TCGA<br>image-level test | 175 / 163         | 140                       | 35                    | 129 | 11 | 12 | 23 | 0.8686   | 0.8229-0.9143   | 0.8571 | 0.7853-0.9186 | 0.6571      | 0.4857-0.8000      | 0.9214      | 0.8714-0.9643      | 0.6765 | 0.9149 | 0.6667 | 0.5397-0.7826 |

## Supplementary Table 11. Calibration and threshold audit summary.

Source workbook: Table 11; 4 data rows and 6 columns.

| analysis set                                                                  | n                                                | centre / source stratum                                    | image source / input type                                                                                         | acquisition metadata visible in SI                                                                                                                           | transportability interpretation                                                                                                                                |
|-------------------------------------------------------------------------------|--------------------------------------------------|------------------------------------------------------------|-------------------------------------------------------------------------------------------------------------------|--------------------------------------------------------------------------------------------------------------------------------------------------------------|----------------------------------------------------------------------------------------------------------------------------------------------------------------|
| External HER2 pathway-readout cohort                                          | 1,410 (Centre 1 136; Centre 2 1194; Centre 3 80) | Three-centre institutional pathway-readout cohort          | Diagnostic H&E WSI feature-bag inputs                                                                             | Centre-level reference-state composition is visible in Supplementary Table 8; restricted slide-level identifiers and scanner serial numbers are not reported | Clinical pathway-readout denominator reserved from checkpoint selection, recalibration and threshold tuning                                                    |
| All-centre external HER2-positive-spectrum validation/model-comparison cohort | 687 (Centre 1 69; Centre 2 589; Centre 3 29)     | Three-centre HER2-positive-spectrum endpoint set           | Diagnostic H&E WSI feature-bag inputs                                                                             | Centre-level composition and reliability are visible in Supplementary Fig. 3 and Supplementary Table 8                                                       | External validation spans three clinical sites; hardware-domain effects such as scanner vendor or model require prospective device-stratified evaluation       |
| External IHC2/FISH boundary subset                                            | 296 (Centre 1 36; Centre 2 251; Centre 3 9)      | IHC2 cases with reflex FISH                                | Diagnostic H&E WSI feature-bag inputs; FISH reference labels are provided only as deidentified derived categories | Centre-level composition and operating counts are visible in Supplementary Fig. 4 and Supplementary Tables 8-9                                               | Fixed-threshold boundary assessment using the prespecified 0.5 conditional score threshold; centre-stratified counts are descriptive because Centre 3 is small |
| Public TCGA-BRCA stress-test set                                              | 175 slides / 163 patients                        | Public TCGA diagnostic-slide workflow after slide-level QC | Public diagnostic DX slides with matched public clinical annotation                                               | Public-data source and QC denominator are visible in Supplementary Fig. 1 and Supplementary Table 10                                                         | Independent public image-level stress test only; not pooled with the institutional validation denominators                                                     |

## Supplementary Table 12. Multiple-instance learning baseline comparison.

Source workbook: Table 12; 6 data rows and 8 columns.

| model         | internal validation accuracy | internal validation macro-AUROC | external state accuracy | external state macro-AUROC | external IHC2/FISH accuracy | external IHC2/FISH AUROC | external IHC2/FISH F1 |
|---------------|------------------------------|---------------------------------|-------------------------|----------------------------|-----------------------------|--------------------------|-----------------------|
| Full CHERIS H | 0.8506                       | 0.9517                          | 0.9068                  | 0.9610                     | 0.9493                      | 0.9429                   | 0.9485                |
| ABMIL         | 0.8040                       | 0.9354                          | 0.6157                  | 0.8220                     | 0.6824                      | 0.7560                   | 0.7432                |
| CLAM          | 0.8121                       | 0.9372                          | 0.5604                  | 0.8146                     | 0.6622                      | 0.7423                   | 0.6667                |
| DSMIL         | 0.7651                       | 0.9066                          | 0.5415                  | 0.7073                     | 0.6318                      | 0.6851                   | 0.5978                |
| DTFD-MIL      | 0.8289                       | 0.9458                          | 0.6230                  | 0.8134                     | 0.6689                      | 0.7371                   | 0.7012                |
| TransMIL-lite | 0.8429                       | 0.9493                          | 0.6317                  | 0.7738                     | 0.6351                      | 0.6929                   | 0.5940                |

### Supplementary Table 13. Paired bootstrap comparison with ABMIL.

Source workbook: Table 13; 5 data rows and 12 columns.

| baseline      | 3-class AUC CHERISH | 3-class AUC baseline | 3-class AUC difference | 3-class difference 95% CI | 3-class empirical P | IHC2/FISH AUC CHERISH | IHC2/FISH AUC baseline | IHC2/FISH AUC difference | IHC2/FISH difference 95% CI | IHC2/FISH empirical P | bootstrap resamples |
|---------------|---------------------|----------------------|------------------------|---------------------------|---------------------|-----------------------|------------------------|--------------------------|-----------------------------|-----------------------|---------------------|
| ABMIL         | 0.9610              | 0.8220               | 0.1390                 | 0.1164-0.1624             | <0.0004             | 0.9429                | 0.7560                 | 0.1869                   | 0.1365-0.2399               | <0.0004               | 5000                |
| CLAM          | 0.9610              | 0.8146               | 0.1464                 | 0.1233-0.1707             | <0.0004             | 0.9429                | 0.7423                 | 0.2006                   | 0.1500-0.2540               | <0.0004               | 5000                |
| DSMIL         | 0.9610              | 0.7073               | 0.2537                 | 0.2230-0.2860             | <0.0004             | 0.9429                | 0.6851                 | 0.2578                   | 0.1998-0.3193               | <0.0004               | 5000                |
| DTFD-MIL      | 0.9610              | 0.8134               | 0.1476                 | 0.1230-0.1741             | <0.0004             | 0.9429                | 0.7371                 | 0.2058                   | 0.1534-0.2607               | <0.0004               | 5000                |
| TransMIL-lite | 0.9610              | 0.7738               | 0.1872                 | 0.1608-0.2145             | <0.0004             | 0.9429                | 0.6929                 | 0.2500                   | 0.1937-0.3084               | <0.0004               | 5000                |

## Supplementary Table 14. Hierarchy-consistency ablation and external stability under domain shift.

Source workbook: Table 14; 7 data rows and 14 columns.

| model / ablation                           | ablation definition                                                                      | polarity anchor | positive-boundary module | clinical base distribution | hierarchy consistency | residual refinement | internal 3-class macro-AUC (5-fold mean) | internal 3-class macro-AUC SD | external 3-class accuracy                      | external 3-class macro-AUC | external IHC2/FISH accuracy                    | external IHC2/FISH AUC                         | external IHC2/FISH F1                          |
|--------------------------------------------|------------------------------------------------------------------------------------------|-----------------|--------------------------|----------------------------|-----------------------|---------------------|------------------------------------------|-------------------------------|------------------------------------------------|----------------------------|------------------------------------------------|------------------------------------------------|------------------------------------------------|
| Full CHERISH                               | Full CHERISH ensemble                                                                    | included        | included                 | included                   | included              | included            | 0.9517                                   | 0.0121                        | 0.9068                                         | 0.9610                     | 0.9493                                         | 0.9429                                         | 0.9485                                         |
| Boundary-state head only                   | Primary boundary-state head without auxiliary clinical-pathway components                | removed         | removed                  | removed                    | removed               | removed             | 0.9511                                   | 0.0142                        | 0.7132 (Delta -0.194; 95% CI -0.223 to -0.165) | 0.8870                     | 0.6588 (Delta -0.291; 95% CI -0.338 to -0.240) | 0.7946                                         | 0.5738                                         |
| No hierarchy consistency                   | Clinical-pathway modules retained but hierarchy-consistency loss removed                 | included        | included                 | included                   | removed               | included            | 0.9458                                   | 0.0125                        | 0.7613                                         | 0.9378                     | 0.6081 (Delta -0.341; 95% CI -0.378 to -0.301) | 0.8818                                         | 0.3696 (Delta -0.579; 95% CI -0.674 to -0.495) |
| No residual refinement                     | Clinical base distribution retained but morphology residual refinement removed           | included        | included                 | included                   | included              | removed             | 0.9288                                   | 0.0165                        | 0.6652 (Delta -0.242; 95% CI -0.280 to -0.204) | 0.8798                     | 0.7297                                         | 0.8144                                         | 0.7561                                         |
| No clinical base distribution              | Clinical-pathway modules retained but clinical base distribution removed                 | included        | included                 | removed                    | included              | included            | 0.9483                                   | 0.0154                        | 0.7453 (Delta -0.162; 95% CI -0.192 to -0.131) | 0.8910                     | 0.7230                                         | 0.7999 (Delta -0.143; 95% CI -0.189 to -0.099) | 0.7172                                         |
| No positive-boundary module + no hierarchy | Positive-boundary module and hierarchy-consistency loss removed together                 | included        | removed                  | included                   | removed               | included            | 0.9459                                   | 0.0152                        | 0.8064                                         | 0.9279                     | 0.7635                                         | 0.8714                                         | 0.7445                                         |
| No positive-boundary module                | Positive-boundary module removed while hierarchy-consistency loss retained where defined | included        | removed                  | included                   | included              | included            | 0.9471                                   | 0.0159                        | 0.8108                                         | 0.9400                     | 0.7804                                         | 0.9273                                         | 0.7347                                         |

## Supplementary Table 15. HoVerNet cellular-feature dictionary.

Source workbook: Table 15; 22 data rows and 6 columns.

| metric category                | metric or concept                                                     | calculation                                                                                                                                                                                                              | denominator / unit                                                                                                   | interpretation                                                                                                         | interpretation boundary                                                                                                                                                              |
|--------------------------------|-----------------------------------------------------------------------|--------------------------------------------------------------------------------------------------------------------------------------------------------------------------------------------------------------------------|----------------------------------------------------------------------------------------------------------------------|------------------------------------------------------------------------------------------------------------------------|--------------------------------------------------------------------------------------------------------------------------------------------------------------------------------------|
| Image-analysis scale           | Processed tile coordinate system                                      | HoVerNet and attention-region metrics are computed from processed tile and nuclear coordinates in the source tables. The analysis uses high-attention region tiles generated at the prespecified processed-tile setting. | Analysis-resolution pixels and processed tile coordinates; not a direct micrometre-calibrated pathology measurement. | Gives readers the coordinate frame for graph distances, neighbourhood radii and tile-region geometry.                  | Pixel-based distances, areas and radii should be interpreted as computational image-analysis units unless an explicit physical calibration is provided in the relevant source table. |
| Attention-region definition    | High-attention tiles                                                  | Tiles with within-slide CHERISH attention values at or above the 80th percentile.                                                                                                                                        | All attention tiles from the same slide at the prespecified processed-tile resolution.                               | Defines the morphologic regions most emphasized by CHERISH within each slide.                                          | Quantiles are computed within slide, so the definition is relative to each WSI and is not an external threshold.                                                                     |
| Attention-region definition    | Low-attention tiles                                                   | Tiles with within-slide CHERISH attention values at or below the 20th percentile.                                                                                                                                        | All attention tiles from the same slide at the prespecified processed-tile resolution.                               | Provides an internal comparator for within-slide high-versus-low attention tissue-context contrasts.                   | Low-attention regions are contrast regions, not negative-control tissue by themselves.                                                                                               |
| HoVerNet cell classes          | Epithelial fraction                                                   | Epithelial-class nuclei divided by epithelial + lymphocyte + macrophage + neutrophil nuclei.                                                                                                                             | Tile, high-attention region, low-attention region or whole-slide region, depending on the source table.              | H&E-derived epithelial/tumour-compartment proxy.                                                                       | HoVerNet classes are morphology-derived labels, not multiplex immunophenotyping.                                                                                                     |
| HoVerNet cell classes          | Immune-like fraction                                                  | Lymphocyte + macrophage + neutrophil nuclei divided by epithelial + lymphocyte + macrophage + neutrophil nuclei.                                                                                                         | Same region denominator as the corresponding epithelial fraction.                                                    | Compact summary of non-epithelial immune-like morphology inside the analysed region.                                   | Immune-like is a pragmatic H&E-derived compartment label; it should not be interpreted as lineage-resolved immune profiling.                                                         |
| HoVerNet cell classes          | Immune:epithelial ratio                                               | Immune-like fraction divided by epithelial fraction. Tile mixed-model count ratios use $\log_2((\text{immune-like count} + 0.5)/(\text{epithelial count} + 0.5))$ .                                                      | Region-level fractions or tile-level counts, as specified by the source table.                                       | Measures the balance between immune-like and epithelial compartments.                                                  | Large values can occur when epithelial counts are low; ratio interpretation should be checked with the paired fraction columns.                                                      |
| Attention-coupled composition  | Attention-weighted epithelial or immune-like fraction                 | Weighted average of per-tile fractions using CHERISH attention values as weights; negative weights, if present, are shifted before weighting.                                                                            | Valid HoVerNet-mapped tiles with nonzero analysed nuclei.                                                            | Asks which cell compartment is enriched in regions receiving higher model attention.                                   | Used for biological interpretation after model finalization.                                                                                                                         |
| High-minus-low contrast        | Within-slide high-versus-low attention contrast                       | Metric in high-attention tiles or nuclei minus the matched low-attention value from the same slide.                                                                                                                      | Within-slide paired high and low attention regions.                                                                  | Controls for slide-level tissue composition by contrasting model-emphasized and less-emphasized areas in the same WSI. | A high-versus-low value is a relative contrast, not an absolute whole-slide abundance estimate.                                                                                      |
| Attention spatial patterning   | Moran's I / Geary's C                                                 | Spatial autocorrelation of tile-level attention or cell-fraction values over 4-neighbour or 8-neighbour tile grids.                                                                                                      | Neighbouring attention tiles with finite values.                                                                     | Higher Moran's I indicates stronger local clustering; Geary's C summarizes local dissimilarity.                        | Spatial autocorrelation is descriptive; it does not establish a causal spatial mechanism.                                                                                            |
| Attention spatial patterning   | Getis-Ord local hotspot summaries                                     | Local neighbourhood z scores comparing each tile's attention neighbourhood with the slide-wide attention distribution.                                                                                                   | Tile plus adjacent neighbourhood in the attention grid.                                                              | Summarizes local high-attention and low-attention clustering.                                                          | Hotspot z-score fractions are descriptive tissue-map summaries and depend on analysed tile geometry.                                                                                 |
| Attention-region geometry      | Fragmentation index                                                   | Number of connected components divided by the number of tiles in a high- or low-attention region using grid connectivity.                                                                                                | Tiles assigned to the specified attention region.                                                                    | Higher values indicate more spatially fragmented attention fields.                                                     | Fragmentation is sensitive to tissue mask geometry and tile coverage; source tables include valid-tile denominators.                                                                 |
| Attention-region geometry      | Largest component fraction / compactness / elongation                 | Connected-component, perimeter, convex-hull and covariance summaries of high- or low-attention tile coordinates.                                                                                                         | Tiles assigned to the specified attention region.                                                                    | Describes whether attention concentrates into compact fields or elongated/dispersed fields.                            | These are morphology-map summaries, not direct cellular phenotypes.                                                                                                                  |
| Cell-neighbour graph           | Nearest-neighbour distance and heterotypic nearest-neighbour fraction | Nearest-neighbour distances between nuclei; heterotypic fraction is the fraction whose nearest neighbour has a different HoVerNet class.                                                                                 | Nuclei in all, high-attention or low-attention regions.                                                              | Measures local cell mixing and spatial proximity across HoVerNet classes.                                              | Pixel-distance units are computational image-analysis units from the processed coordinate system and are not reported as calibrated micrometres.                                     |
| Cell-neighbour graph           | Delaunay edge fractions                                               | Delaunay graph is built from nuclear centroids; edge fractions summarize homotypic, heterotypic and specified epithelial-immune edge classes.                                                                            | Nuclei with valid centroids; very large graphs were skipped or flagged during QC.                                    | Captures local tissue adjacency beyond single nearest neighbours.                                                      | Graph metrics are derived from centroids and do not imply physical membrane contact.                                                                                                 |
| Cell-neighbour graph           | Minimum-spanning-tree edge length                                     | Mean, median or percentile of edge lengths from the centroid-based minimum spanning tree.                                                                                                                                | Nuclear centroids connected by the centroid graph.                                                                   | Summarizes cellular compaction or dispersion in the analysed region.                                                   | Interpret together with cell density and total cell counts.                                                                                                                          |
| Spatial cross-type interaction | G-cross / Ripley's L-cross epithelial-lymphocyte metrics              | Counts or transformed K-function summaries of neighbouring nuclei of one class around nuclei of another class within fixed radii.                                                                                        | Nuclei of the specified source and target HoVerNet classes.                                                          | Measures local epithelial-lymphocyte apposition or mixing.                                                             | These statistics are spatial-context descriptors and are not lineage-resolved immune validation.                                                                                     |
| Spatial colocalization         | Morisita-Horn epithelial-lymphocyte tile colocalization               | Similarity of epithelial and lymphocyte count distributions across attention tiles.                                                                                                                                      | Tile-level epithelial and lymphocyte count vectors.                                                                  | Higher values indicate stronger co-occurrence of the two compartments across the analysed tile grid.                   | Co-occurrence is affected by tile resolution and tissue coverage.                                                                                                                    |
| Neighbourhood motifs           | Epithelial-only, lymphocyte-only and mixed neighbourhood fractions    | For each nucleus, neighbours within a 50-pixel radius are classified by whether they contain epithelial, lymphocyte and/or myeloid-like classes.                                                                         | Nuclei with valid centroid coordinates.                                                                              | Provides an interpretable local-niche summary of pure versus mixed cellular neighbourhoods.                            | The 50-pixel radius is a computational neighbourhood definition, not a histologic structure boundary.                                                                                |

| <b>metric category</b> | <b>metric or concept</b>                                          | <b>calculation</b>                                                                                                                                                                                                                                                                                                       | <b>denominator / unit</b>                                                      | <b>interpretation</b>                                                                                   | <b>interpretation boundary</b>                                                                                                     |
|------------------------|-------------------------------------------------------------------|--------------------------------------------------------------------------------------------------------------------------------------------------------------------------------------------------------------------------------------------------------------------------------------------------------------------------|--------------------------------------------------------------------------------|---------------------------------------------------------------------------------------------------------|------------------------------------------------------------------------------------------------------------------------------------|
| Nuclear morphology     | Nuclear area, eccentricity, solidity and coefficient of variation | Contour- or box-derived nuclear geometry summaries. Area is measured in analysis-resolution pixel area; perimeter and axis lengths are measured in analysis-resolution pixels; eccentricity and solidity are dimensionless. Coefficient of variation is standard deviation divided by mean for the relevant nucleus set. | HoVerNet-segmented nuclei with valid contour or box geometry.                  | Quantifies nuclear size/shape heterogeneity in epithelial or all-cell compartments.                     | Chromatin-intensity features were not used because the redistributed HoVerNet outputs do not provide validated intensity channels. |
| Statistical summary    | FISH-positive versus FISH-negative tests                          | Two-sided Mann-Whitney U tests on slide-level metrics with Benjamini-Hochberg FDR correction.                                                                                                                                                                                                                            | Slide-level metric values in IHC2/FISH-negative and IHC2/FISH-positive groups. | Supports FISH-boundary feature-evidence summaries.                                                      | These tests support biological interpretation after the model and thresholds were finalized.                                       |
| Statistical summary    | Ordered HER2-spectrum trends                                      | Spearman correlation with ordered group score IHC2/FISH-negative = 0, IHC2/FISH-positive = 1 and IHC3 = 2; BH-FDR is reported across tested metrics.                                                                                                                                                                     | Slide-level metric values across the three HER2-spectrum groups.               | Tests whether tissue-context metrics follow an ordered HER2-spectrum gradient.                          | Ordered trends support tissue-state interpretation, not causal HER2 amplification mechanisms.                                      |
| Statistical summary    | Tile mixed model                                                  | Mixed linear model: metric ~ within-slide attention z score x FISH-positive status + random intercept for slide.                                                                                                                                                                                                         | Valid HoVerNet-mapped top/bottom attention tiles.                              | Checks whether tile-level attention-metric coupling persists with slide-level clustering accounted for. | Included as supporting quantitative evidence for readers who want tile-level modelling details.                                    |

## Supplementary Table 16. HoVerNet whole-slide and attention-ranked cellular architecture summary.

Source workbook: Table 16; 11 data rows and 14 columns.

| measurement layer        | metric family                                  | metric                                  | region | slides with valid metric | IHC2/FISH- n | IHC2/FISH- median | IHC2/FISH+ n | IHC2/FISH+ median | IHC3 n | IHC3 median | ordered HER2-spectrum Spearman rho | BH-FDR   | pattern across HER2 spectrum |
|--------------------------|------------------------------------------------|-----------------------------------------|--------|--------------------------|--------------|-------------------|--------------|-------------------|--------|-------------|------------------------------------|----------|------------------------------|
| nuclear spatial metrics  | epithelial composition / epithelial morphology | High-low epithelial fraction            |        | 1139                     | 402          | 0.0165            | 226          | -0.0225           | 511    | -0.0866     | -0.3439                            | 5.22e-31 | stepwise decrease            |
| nuclear spatial metrics  | immune infiltration / immune-epithelial mixing | High-low lymphocyte fraction            |        | 1139                     | 402          | -0.0168           | 226          | 0.0180            | 511    | 0.0733      | 0.3117                             | 2.01e-25 | stepwise increase            |
| cell-composition metrics | immune infiltration / immune-epithelial mixing | High-attention immune:epithelial ratio  | high   | 1140                     | 402          | 0.5477            | 226          | 0.8134            | 512    | 0.8384      | 0.2843                             | 3.09e-21 | FISH-positive peak           |
| cell-composition metrics | epithelial composition / epithelial morphology | High-attention epithelial fraction      | high   | 1139                     | 402          | 0.6461            | 226          | 0.5515            | 511    | 0.5441      | -0.2839                            | 3.09e-21 | stepwise decrease            |
| cell-composition metrics | immune infiltration / immune-epithelial mixing | High-attention immune-like fraction     | high   | 1139                     | 402          | 0.3539            | 226          | 0.4485            | 511    | 0.4559      | 0.2839                             | 3.09e-21 | stepwise increase            |
| tile spatial metrics     | epithelial composition / epithelial morphology | Attention-weighted epithelial fraction  |        | 1140                     | 402          | 0.5547            | 226          | 0.4754            | 512    | 0.4610      | -0.2828                            | 3.94e-21 | stepwise decrease            |
| tile spatial metrics     | immune infiltration / immune-epithelial mixing | Attention-weighted immune-like fraction |        | 1140                     | 402          | 0.4453            | 226          | 0.5246            | 512    | 0.5390      | 0.2828                             | 3.94e-21 | stepwise increase            |
| tile spatial metrics     | spatial organization / heterogeneity           | High-attention fragmentation            |        | 1140                     | 402          | 0.3732            | 226          | 0.3853            | 512    | 0.4247      | 0.2670                             | 6.28e-19 | stepwise increase            |
| cell-composition metrics | immune infiltration / immune-epithelial mixing | High-attention lymphocyte fraction      | high   | 1139                     | 402          | 0.3198            | 226          | 0.4153            | 511    | 0.4150      | 0.2428                             | 9.74e-16 | FISH-positive peak           |
| nuclear spatial metrics  | immune infiltration / immune-epithelial mixing | High-low heterotypic edge fraction      |        | 1032                     | 394          | 0.0043            | 222          | 0.0092            | 416    | 0.0302      | 0.2191                             | 8.05e-12 | stepwise increase            |
| nuclear spatial metrics  | immune infiltration / immune-epithelial mixing | All-region heterotypic edge fraction    |        | 854                      | 349          | 0.2743            | 215          | 0.2900            | 290    | 0.2971      | 0.1798                             | 4.85e-07 | stepwise increase            |

## Supplementary Table 17. HoVerNet high-attention cellular-neighbourhood statistics.

Source workbook: Table 17; 24 data rows and 15 columns.

| metric family                                     | metric                                          | interpretive feature family                         | evidence rank among tested metrics | IHC2/FISH-n | IHC2/FISH+n | IHC2/FISH-mean | IHC2/FISH+mean | mean delta FISH+ minus FISH- | IHC2/FISH-median | IHC2/FISH+median | median delta FISH+ minus FISH- | direction       | P value  | BH-FDR   |
|---------------------------------------------------|-------------------------------------------------|-----------------------------------------------------|------------------------------------|-------------|-------------|----------------|----------------|------------------------------|------------------|------------------|--------------------------------|-----------------|----------|----------|
| epithelial compartment                            | Whole-slide epithelial fraction                 | whole-slide cellular composition                    | whole-slide summary                | 402         | 226         |                |                | -0.0804                      | 0.6516           | 0.5743           | -0.0772                        | lower in FISH+  |          | 3.74e-07 |
| immune infiltration / epithelial-immune interface | Whole-slide immune-like fraction                | whole-slide cellular composition                    | whole-slide summary                | 402         | 226         |                |                | 0.0804                       | 0.3484           | 0.4257           | 0.0772                         | higher in FISH+ |          | 3.74e-07 |
| immune infiltration / epithelial-immune interface | Whole-slide lymphocyte fraction                 | whole-slide cellular composition                    | whole-slide summary                | 402         | 226         |                |                | 0.0787                       | 0.3128           | 0.3879           | 0.0751                         | higher in FISH+ |          | 1.03e-06 |
| epithelial compartment                            | Whole-slide epithelial nuclear area CV          | whole-slide epithelial nuclear heterogeneity        | whole-slide summary                | 402         | 226         |                |                | 0.0419                       | 0.5575           | 0.5963           | 0.0388                         | higher in FISH+ |          | 1.61e-13 |
| attention composition                             | High-attention epithelial fraction              | composition inside high-attention regions           | 34                                 | 402         | 226         | 0.6358         | 0.5372         | -0.0986                      | 0.6461           | 0.5515           | -0.0946                        | lower in FISH+  | 1.19e-11 | 1.78e-10 |
| attention composition                             | High-attention lymphocyte fraction              | composition inside high-attention regions           | 41                                 | 402         | 226         | 0.3287         | 0.4251         | 0.0964                       | 0.3198           | 0.4153           | 0.0955                         | higher in FISH+ | 5.65e-11 | 7.47e-10 |
| attention composition                             | High-attention immune:epithelial ratio          | composition inside high-attention regions           | 33                                 | 402         | 226         | 0.7799         | 1.1886         | 0.4088                       | 0.5477           | 0.8134           | 0.2656                         | higher in FISH+ | 1.18e-11 | 1.78e-10 |
| attention composition                             | Immune-interface axis score                     | composition inside high-attention regions           | 19                                 | 402         | 226         | -0.3737        | 0.0926         | 0.4663                       | -0.3802          | 0.1675           | 0.5477                         | higher in FISH+ | 9.61e-13 | 2.54e-11 |
| attention-weighted ecology                        | Attention-weighted immune:epithelial ratio      | cellular balance weighted by CHERISH attention      | 40                                 | 402         | 226         | 0.7489         | 1.2175         | 0.4687                       | 0.5631           | 0.8818           | 0.3187                         | higher in FISH+ | 1.68e-11 | 2.38e-10 |
| attention-weighted ecology                        | Attention-weighted immune-like fraction         | cellular balance weighted by CHERISH attention      | 46                                 | 402         | 226         | 0.4494         | 0.5373         | 0.0879                       | 0.4453           | 0.5246           | 0.0793                         | higher in FISH+ | 8.16e-11 | 1.01e-09 |
| attention spatial patterning                      | Local attention clustering                      | spatial clustering and autocorrelation of attention | 108                                | 402         | 226         | -1.3212        | -1.0863        | 0.2349                       | -1.3268          | -0.8572          | 0.4696                         | higher in FISH+ | 7.88e-08 | 4.14e-07 |
| attention spatial patterning                      | Attention spatial autocorrelation               | spatial clustering and autocorrelation of attention | 170                                | 402         | 226         | 0.0996         | 0.0808         | -0.0188                      | 0.0890           | 0.0572           | -0.0318                        | lower in FISH+  | 5.17e-06 | 1.73e-05 |
| attention-region geometry                         | High-attention elongation                       | shape and compactness of attention fields           | 50                                 | 402         | 226         | 3.4553         | 2.6497         | -0.8056                      | 3.1024           | 2.3377           | -0.7647                        | lower in FISH+  | 1.08e-10 | 1.22e-09 |
| attention-region geometry                         | Low-attention compactness                       | shape and compactness of attention fields           | 94                                 | 402         | 226         | 0.0078         | 0.0113         | 0.0035                       | 0.0064           | 0.0083           | 0.0019                         | higher in FISH+ | 2.52e-08 | 1.52e-07 |
| attention-region geometry                         | High-attention convex-hull fill                 | shape and compactness of attention fields           | 143                                | 402         | 226         | 0.0605         | 0.0726         | 0.0121                       | 0.0559           | 0.0688           | 0.0129                         | higher in FISH+ | 1.19e-06 | 4.75e-06 |
| attention-region geometry                         | High-low centroid separation                    | shape and compactness of attention fields           | 119                                | 402         | 226         | 14.3072        | 10.7867        | -3.5204                      | 12.6999          | 8.8524           | -3.8476                        | lower in FISH+  | 1.81e-07 | 8.64e-07 |
| neighborhood ecology                              | Epithelial-only neighborhood fraction           | local epithelial or lymphocyte neighborhoods        | 16                                 | 402         | 226         | 0.4606         | 0.3625         | -0.0981                      | 0.4550           | 0.3527           | -0.1023                        | lower in FISH+  | 6.58e-13 | 2.34e-11 |
| neighborhood ecology                              | Lymphocyte-only neighborhood fraction           | local epithelial or lymphocyte neighborhoods        | 59                                 | 402         | 226         | 0.1685         | 0.2407         | 0.0722                       | 0.1526           | 0.2194           | 0.0669                         | higher in FISH+ | 4.80e-10 | 4.62e-09 |
| cell-neighbor graph                               | Heterotypic nearest-neighbor fraction           | heterotypic cell-contact structure                  | 138                                | 402         | 226         | 0.1867         | 0.2080         | 0.0213                       | 0.1884           | 0.2076           | 0.0192                         | higher in FISH+ | 7.04e-07 | 2.88e-06 |
| cell-neighbor graph                               | Epithelial-neutrophil edge fraction             | heterotypic cell-contact structure                  | 149                                | 398         | 224         | 0.0029         | 0.0048         | 0.0019                       | 0.0020           | 0.0031           | 0.0011                         | higher in FISH+ | 1.72e-06 | 6.56e-06 |
| nuclear morphology                                | Epithelial nuclear area CV                      | epithelial nuclear size and heterogeneity           | 1                                  | 402         | 226         | 0.5730         | 0.6215         | 0.0485                       | 0.5666           | 0.6166           | 0.0500                         | higher in FISH+ | 5.19e-18 | 1.66e-15 |
| nuclear morphology                                | High-attention nuclear area median              | epithelial nuclear size and heterogeneity           | 5                                  | 402         | 226         | 280.0908       | 252.1040       | -27.9868                     | 276.2500         | 245.5000         | -30.7500                       | lower in FISH+  | 2.93e-16 | 3.33e-14 |
| nuclear morphology                                | High-attention nuclear major-axis length median | epithelial nuclear size and heterogeneity           | 8                                  | 402         | 226         | 24.4467        | 23.2050        | -1.2417                      | 24.2895          | 22.9331          | -1.3564                        | lower in FISH+  | 1.83e-14 | 1.30e-12 |
| nuclear morphology                                | High-attention nuclear perimeter median         | epithelial nuclear size and heterogeneity           | 13                                 | 402         | 226         | 68.8301        | 65.4251        | -3.4049                      | 68.5269          | 64.9056          | -3.6213                        | lower in FISH+  | 1.72e-13 | 7.52e-12 |

## Supplementary Table 18. Spatial transcriptomics dataset-selection and sample metadata.

Source workbook: Table 18; 6 data rows and 6 columns.

| screening step                                       | n    | screened / included IDs                                         | key count                                                    | screening decision                                                  | interpretation boundary                                  |
|------------------------------------------------------|------|-----------------------------------------------------------------|--------------------------------------------------------------|---------------------------------------------------------------------|----------------------------------------------------------|
| HEST v1.2 total entries                              | 1255 |                                                                 |                                                              | Screening universe only.                                            | Metadata screen; not clinical validation.                |
| Human breast-cancer spatial entries                  | 128  |                                                                 | Spatial Transcriptomics 108; Xenium 9; Visium 8; Visium HD 3 | Candidate pool for public breast-cancer spatial support.            | No cross-assay pooling.                                  |
| Standard Visium human breast-cancer entries          | 8    | TENX68; TENX53; TENX39; TENX24; TENX23; TENX14; TENX13; NCBI776 | HER2-positive 2; HER2-negative 2; no explicit HER2 status 4  | Screened for explicit HER2-positive metadata and WTA compatibility. | No HER2-negative control use without IHC0/1+ resolution. |
| Standard Visium with explicit HER2-positive metadata | 2    | TENX14; TENX13                                                  | Public 10x Block A Sections 1 and 2                          | Included as primary public Visium tissue-context support.           | Serial sections; not independent validation.             |
| HER2-positive Xenium candidates                      | 3    | NCBI785; NCBI784; NCBI783                                       | Targeted 541-gene in situ panel                              | Reviewed but not pooled into main spatial analysis.                 | Not WTA-comparable.                                      |
| HER2-positive Spatial Transcriptomics candidates     | 36   | not listed in compact table                                     | Median tissue spots 320; range 176-712                       | Reviewed but not pooled into main spatial analysis.                 | Older geometry and lower spot coverage.                  |

### Supplementary Table 19. Visium spot joining and attention-projection QC.

Source workbook: Table 19; 2 data rows and 11 columns.

| public section      | sample ID | assay  | receptor metadata                       | HEST tissue spots | analysed Visium spots | attention rows | joined spots | joined / attention rows | top/bottom 20% spots | SI role                                                  |
|---------------------|-----------|--------|-----------------------------------------|-------------------|-----------------------|----------------|--------------|-------------------------|----------------------|----------------------------------------------------------|
| (Block A Section 1) | TENX13    | Visium | ER positive; PR negative; HER2 positive | 3813              | 3798                  | 3813           | 3789         | 3789/3813 (99.4%)       | 759 high; 758 low    | Included public HER2-positive Visium WTA context section |
| (Block A Section 2) | TENX14    | Visium | ER positive; PR negative; HER2 positive | 4015              | 3987                  | 4015           | 3984         | 3984/4015 (99.2%)       | 797 high; 799 low    | Included public HER2-positive Visium WTA context section |

## Supplementary Table 20. Neoadjuvant response-context and receptor-background analyses.

Source workbook: Table 20; 21 data rows and 6 columns.

| analysis                                        | group                                              | n   | events / total  | value                                                                                                                                                                                       | definition                                                                                                                                                                                                                       |
|-------------------------------------------------|----------------------------------------------------|-----|-----------------|---------------------------------------------------------------------------------------------------------------------------------------------------------------------------------------------|----------------------------------------------------------------------------------------------------------------------------------------------------------------------------------------------------------------------------------|
| HER2 spectrum pCR                               | IHC2/FISH-                                         | 35  | 15/35           | 42.9% (Wilson 95% CI 28.0-59.1)                                                                                                                                                             | IHC2 with non-amplified FISH                                                                                                                                                                                                     |
| HER2 spectrum pCR                               | IHC2/FISH+                                         | 22  | 17/22           | 77.3% (Wilson 95% CI 56.6-89.9)                                                                                                                                                             | IHC2 with amplified FISH                                                                                                                                                                                                         |
| HER2 spectrum pCR                               | IHC3                                               | 80  | 72/80           | 90.0% (Wilson 95% CI 81.5-94.8)                                                                                                                                                             | IHC3 HER2-positive by immunohistochemistry                                                                                                                                                                                       |
| ER/PR axis pCR                                  | ER-/PR-                                            | 69  | 62/69           | 89.9% (Wilson 95% CI 80.5-95.0)                                                                                                                                                             | ER/PR receptor-context axis                                                                                                                                                                                                      |
| ER/PR axis pCR                                  | single HR+                                         | 38  | 33/38           | 86.8% (Wilson 95% CI 72.7-94.2)                                                                                                                                                             | ER/PR receptor-context axis                                                                                                                                                                                                      |
| ER/PR axis pCR                                  | ER+/PR+                                            | 30  | 9/30            | 30.0% (Wilson 95% CI 16.7-47.9)                                                                                                                                                             | ER/PR receptor-context axis                                                                                                                                                                                                      |
| CHERISH pCR discrimination                      | CHERISH morphology score                           | 137 | 104/137         | AUROC 0.8631 (95% CI 0.793-0.920); AUPRC 0.9553 (95% CI 0.932-0.976)                                                                                                                        | Locked morphology score; no pCR retraining, calibration or threshold tuning; bootstrap confidence intervals.                                                                                                                     |
| HoVerNet response-niche pCR discrimination      | Response-niche score                               | 137 | 104/137         | AUROC 0.8150; AUPRC 0.9232; response-niche score $P=5.4e-08$ ; component FDRs: epithelial-lymphocyte apposition 0.002, cellular compaction $7.5e-04$ , nuclear-size heterogeneity $5.1e-04$ | Post-validation composite of epithelial-lymphocyte apposition, local compaction and nuclear heterogeneity; component tests use two-sided Mann-Whitney U with Benjamini-Hochberg FDR across displayed HoVerNet axes.              |
| HER2 spectrum pCR trend                         | Ordered IHC2/FISH- to IHC2/FISH+ to IHC3           | 137 | 104/137         | ordered-trend $P=9.54e-08$                                                                                                                                                                  | pCR rates 42.9%, 77.3% and 90.0% across IHC2/FISH-, IHC2/FISH+ and IHC3                                                                                                                                                          |
| Incremental response-niche model                | CHERISH morphology score plus response-niche score | 137 | 104/137         | AUROC 0.863054 to 0.885198; delta AUROC 0.022145; LR $P=5.3e-04$                                                                                                                            | Nested logistic comparison against the locked CHERISH morphology-score model; no pCR retraining of CHERISH.                                                                                                                      |
| ER/PR axis CHERISH morphology score             | ER-/PR-                                            | 69  |                 | Polarity anchor 0.718; non-negative probability 0.839; IHC3-like probability 0.682                                                                                                          | Mean model readouts by receptor-context group; Spearman rho values across the ordered ER/PR axis: polarity anchor -0.3873, non-negative probability -0.3780, IHC3-like probability -0.3662.                                      |
| ER/PR axis CHERISH morphology score             | single HR+                                         | 38  |                 | Polarity anchor 0.584; non-negative probability 0.761; IHC3-like probability 0.610                                                                                                          | Mean model readouts by receptor-context group; source-level values support Fig. 5d heatmap rounding.                                                                                                                             |
| ER/PR axis CHERISH morphology score             | ER+/PR+                                            | 30  |                 | Polarity anchor 0.417; non-negative probability 0.452; IHC3-like probability 0.306                                                                                                          | Mean model readouts by receptor-context group; source-level values support Fig. 5d heatmap rounding.                                                                                                                             |
| ER/PR axis response-niche score                 | ER-/PR-                                            | 69  |                 | 0.201                                                                                                                                                                                       | Mean value by receptor-context group; Spearman rho -0.2818, $P=0.0008$ .                                                                                                                                                         |
| ER/PR axis response-niche score                 | single HR+                                         | 38  |                 | 0.035                                                                                                                                                                                       | Mean value by receptor-context group; Spearman rho -0.2818, $P=0.0008$ .                                                                                                                                                         |
| ER/PR axis response-niche score                 | ER+/PR+                                            | 30  |                 | -0.506                                                                                                                                                                                      | Mean value by receptor-context group; Spearman rho -0.2818, $P=0.0008$ .                                                                                                                                                         |
| ER/PR axis pCR trend                            | Ordered ER-/PR- to single HR+ to ER+/PR+           | 137 | 104/137         | Spearman rho -0.4628; $P=1.24e-08$                                                                                                                                                          | pCR rates 89.9%, 86.8% and 30.0% across the ordered ER/PR receptor-context axis; receptor-context HoVerNet attenuation metrics in Fig. 5e: nuclear regularity FDR=0.004 and reduced epithelial-immune proximity FDR=0.005.       |
| IHC2/FISH-amplified undercall by ER status      | ER-positive vs ER-negative                         | 223 | 62/139 vs 24/84 | Fisher exact test $P=0.0228$                                                                                                                                                                | ER-positive and ER-negative undercall rates among true IHC2/FISH-amplified cases in internal development OOF predictions                                                                                                         |
| IHC2/FISH-amplified undercall by ER/PR status   | ER+/PR+                                            | 76  | 38/76           | 50.0%; internal undercall composition ER-/PR- 24/86, single HR+ 24/86, ER+/PR+ 38/86                                                                                                        | ER+/PR+ undercall rate and displayed receptor-context composition among true IHC2/FISH-amplified internal OOF undercalled cases.                                                                                                 |
| TCGA IHC2/FISH-amplified undercall by HR status | HR-positive among underestimated slides            | 12  | 12/12           | 100.0%; TCGA undercall composition ER-/PR- 0/12, single HR+ 2/12, ER+/PR+ 10/12                                                                                                             | Hormone-receptor-positive composition and displayed receptor-context composition among false-negative undercalled true FISH-amplified TCGA-BRCA slides; the 12 undercalled slides represented 12 unique patients.                |
| External boundary error by HR status            | HR-positive vs HR-negative                         | 285 | 25/221 vs 9/64  | 11.3% vs 14.1%; external undercalled FISH-amplified composition ER-/PR- 2/11, single HR+ 1/11, ER+/PR+ 8/11                                                                                 | Overall boundary errors in the locked external IHC2/FISH subset with complete ER/PR; no hormone-receptor-positive enrichment was observed. Displayed undercall composition is restricted to false-negative FISH-amplified cases. |

### Supplementary Table 21. Response-niche covariate-adjusted pCR association models.

Source workbook: Table 21; 5 data rows and 10 columns.

| model                            | n   | pCR / non-pCR patients | adjustment variables                                                                             | response-niche OR | response-niche OR 95% CI | response-niche P value | apparent AUROC | AIC      | converged |
|----------------------------------|-----|------------------------|--------------------------------------------------------------------------------------------------|-------------------|--------------------------|------------------------|----------------|----------|-----------|
| Unadjusted                       | 137 | 104/33                 | response-niche score only                                                                        | 3.4457            | 1.9518-6.0832            | 1.99e-05               | 0.8150         | 128.4169 | True      |
| HER2-spectrum adjusted           | 137 | 104/33                 | HER2-spectrum group                                                                              | 3.0328            | 1.7096-5.3801            | 0.0001                 | 0.8488         | 112.1014 | True      |
| HER2-spectrum and ER/PR adjusted | 137 | 104/33                 | HER2-spectrum group + ER/PR group                                                                | 2.8420            | 1.5460-5.2242            | 0.0008                 | 0.9009         | 98.1822  | True      |
| Stage/biomarker adjusted         | 136 | 103/33                 | HER2-spectrum group + ER/PR group + age + cT + cN + Ki67                                         | 3.3906            | 1.6941-6.7860            | 0.0006                 | 0.9088         | 100.8279 | True      |
| Treatment-available adjusted     | 127 | 98/29                  | HER2-spectrum group + ER/PR group + age + cT + cN + Ki67 + regimen/cycles/anti-HER2 availability | 5.3387            | 2.0323-14.0242           | 0.0007                 | 0.9490         | 83.6528  | True      |

## Supplementary Table 22. Receptor-context undercall composition across cohorts.

Source workbook: Table 22; 3 data rows and 7 columns.

| cohort                     | analysis set                                            | true FISH+ called non-amplified | true FISH+ called amplified | positive-boundary support among initially undercalled FISH+ cases | support percent | interpretation                                        |
|----------------------------|---------------------------------------------------------|---------------------------------|-----------------------------|-------------------------------------------------------------------|-----------------|-------------------------------------------------------|
| Internal development OOF   | primary boundary-state IHC2/FISH boundary assessment    | 86                              | 140                         | 81/86                                                             | 94.2%           | Internal out-of-fold review-alert summary             |
| Locked external validation | All-centre external IHC2/FISH boundary subset           | 11                              | 138                         | 7/11                                                              | 63.6%           | Locked external boundary-subset review-alert summary  |
| Public TCGA stress test    | TCGA-BRCA diagnostic-slide boundary stress test (n=175) | 12                              | 23                          | 12/12                                                             | 100.0%          | Public TCGA boundary stress-test review-alert summary |

## Supplementary Table 23. Spatial transcriptomic module and cell-state source statistics.

Source workbook: Table 23; 34 data rows and 12 columns.

| evidence layer                       | readout                                             | sample / scope                   | n high | n low | mean high | mean low | effect estimate | P value    | FDR        | direction                                          | manuscript use                                       |
|--------------------------------------|-----------------------------------------------------|----------------------------------|--------|-------|-----------|----------|-----------------|------------|------------|----------------------------------------------------|------------------------------------------------------|
| primary_spatial_readout              | ERBB2-neighbourhood epithelial/proliferative module | TENX13 top/bottom 20pct          |        |       |           |          | log2diff=0.141  | 1.07e-23   |            | high-attention enriched                            | Fig. 4d-f; main text module contrast                 |
| primary_spatial_readout              | ERBB2-neighbourhood epithelial/proliferative module | TENX14 top/bottom 20pct          |        |       |           |          | log2diff=0.256  | 8.34e-70   |            | high-attention enriched                            | Fig. 4d-f; main text module contrast                 |
| targeted_sensitivity                 | ERBB2 amplicon core                                 | TENX13 top/bottom 20pct          |        |       |           |          | log2diff=0.054  | 1.17e-05   |            | high-attention enriched                            | Fig. 4d-f; main text module contrast                 |
| targeted_sensitivity                 | ERBB2 amplicon core                                 | TENX14 top/bottom 20pct          |        |       |           |          | log2diff=0.139  | 2.27e-20   |            | high-attention enriched                            | Fig. 4d-f; main text module contrast                 |
| targeted_sensitivity                 | custom ERBB signaling module                        | TENX13 top/bottom 20pct          |        |       |           |          | log2diff=0.098  | 1.65e-15   |            | high-attention enriched                            | Fig. 4d-f; main text module contrast                 |
| targeted_sensitivity                 | custom ERBB signaling module                        | TENX14 top/bottom 20pct          |        |       |           |          | log2diff=0.143  | 5.94e-32   |            | high-attention enriched                            | Fig. 4d-f; main text module contrast                 |
| cell2location high-low contrast      | Macrophage                                          | high_20pct_vs_low_20pct          | 1556   | 1553  | 0.437615  | 0.590573 | -0.152958       | 1.588e-47  | 2.699e-46  | low_attention_enriched                             | Fig. 4g-j; main text cell-state contrast             |
| cell2location high-low contrast      | Malignant_LumA_SC                                   | high_20pct_vs_low_20pct          | 1556   | 1553  | 0.78211   | 0.424524 | 0.357586        | 5.256e-42  | 4.468e-41  | high_attention_enriched                            | Fig. 4g-j; main text cell-state contrast             |
| cell2location high-low contrast      | Monocyte_DC                                         | high_20pct_vs_low_20pct          | 1556   | 1553  | 0.415355  | 0.456734 | -0.041379       | 6.228e-36  | 3.529e-35  | low_attention_enriched                             | Fig. 4g-j; main text cell-state contrast             |
| cell2location high-low contrast      | Malignant_Cycling                                   | high_20pct_vs_low_20pct          | 1556   | 1553  | 0.644428  | 0.340313 | 0.304115        | 8.338e-35  | 3.544e-34  | high_attention_enriched                            | Fig. 4g-j; main text cell-state contrast             |
| cell2location high-low contrast      | Plasmablasts                                        | high_20pct_vs_low_20pct          | 1556   | 1553  | 0.350316  | 0.515348 | -0.165032       | 2.038e-24  | 6.931e-24  | low_attention_enriched                             | Fig. 4g-j; main text cell-state contrast             |
| cell2location high-low contrast      | CAF_iCAF                                            | high_20pct_vs_low_20pct          | 1556   | 1553  | 0.424229  | 0.495863 | -0.0716344      | 2.041e-13  | 5.783e-13  | low_attention_enriched                             | Fig. 4g-j; main text cell-state contrast             |
| cell2location high-low contrast      | Myoepithelial                                       | high_20pct_vs_low_20pct          | 1556   | 1553  | 0.553307  | 0.3781   | 0.175207        | 6.081e-11  | 1.477e-10  | high_attention_enriched                            | Fig. 4g-j; main text cell-state contrast             |
| cell2location high-low contrast      | Malignant_Basal_SC                                  | high_20pct_vs_low_20pct          | 1556   | 1553  | 0.575044  | 0.364716 | 0.210328        | 1.722e-06  | 3.660e-06  | high_attention_enriched                            | Fig. 4g-j; main text cell-state contrast             |
| cell2location high-low contrast      | PVL                                                 | high_20pct_vs_low_20pct          | 1556   | 1553  | 0.519045  | 0.423137 | 0.0959079       | 1.315e-04  | 2.484e-04  | high_attention_enriched                            | Fig. 4g-j; main text cell-state contrast             |
| cell2location high-low contrast      | CAF_myCAF                                           | high_20pct_vs_low_20pct          | 1556   | 1553  | 0.493501  | 0.538855 | -0.0453539      | 0.0032005  | 0.00394408 | low_attention_enriched                             | Fig. 4g-j; main text cell-state contrast             |
| cell2location high-low contrast      | Mature_Luminal                                      | high_20pct_vs_low_20pct          | 1556   | 1553  | 0.742943  | 0.459764 | 0.283179        | 0.00358709 | 0.00554369 | high_attention_enriched                            | Fig. 4g-j; main text cell-state contrast             |
| cell2location high-low contrast      | Malignant_LumB_SC                                   | high_20pct_vs_low_20pct          | 1556   | 1553  | 0.694656  | 0.471882 | 0.222774        | 0.0220787  | 0.0312782  | high_attention_enriched                            | Fig. 4g-j; main text cell-state contrast             |
| cell2location high-low contrast      | T_NK                                                | high_20pct_vs_low_20pct          | 1556   | 1553  | 0.565397  | 0.547016 | 0.0183801       | 0.0261818  | 0.0342377  | high_attention_enriched                            | Fig. 4g-j; main text cell-state contrast             |
| cell2location high-low contrast      | B_cells                                             | high_20pct_vs_low_20pct          | 1556   | 1553  | 0.550615  | 0.517689 | 0.0329257       | 0.435642   | 0.528994   | higher mean in high attention; not FDR-significant | Fig. 4g-j; main text cell-state contrast             |
| cell2location high-low contrast      | Malignant_HER2_SC                                   | high_20pct_vs_low_20pct          | 1556   | 1553  | 0.623052  | 0.422647 | 0.200405        | 0.587673   | 0.66603    | higher mean in high attention; not FDR-significant | Fig. 4g-j; main text cell-state contrast             |
| cell2location high-low contrast      | Luminal_Progenitors                                 | high_20pct_vs_low_20pct          | 1556   | 1553  | 0.587265  | 0.394971 | 0.192293        | 0.794026   | 0.843653   | higher mean in high attention; not FDR-significant | Fig. 4g-j; main text cell-state contrast             |
| cell2location high-low contrast      | Endothelial                                         | high_20pct_vs_low_20pct          | 1556   | 1553  | 0.503507  | 0.47396  | 0.029547        | 0.92607    | 0.92607    | higher mean in high attention; not FDR-significant | Fig. 4g-j; main text cell-state contrast             |
| cell2location continuous association | CAF_iCAF                                            | pooled continuous attention      |        |       |           |          | -0.0467216      | 2.964e-05  | 6.572e-05  | negative with attention                            | Fig. 4j; continuous attention-cell-state association |
| cell2location continuous association | CAF_myCAF                                           | pooled continuous attention      |        |       |           |          | -0.0505541      | 8.615e-07  | 2.584e-06  | negative with attention                            | Fig. 4j; continuous attention-cell-state association |
| cell2location continuous association | Macrophage                                          | pooled continuous attention      |        |       |           |          | -0.0730941      | 1.640e-14  | 2.788e-13  | negative with attention                            | Fig. 4j; continuous attention-cell-state association |
| cell2location continuous association | Malignant_Cycling                                   | pooled continuous attention      |        |       |           |          | 0.0509251       | 1.137e-11  | 8.281e-11  | positive with attention                            | Fig. 4j; continuous attention-cell-state association |
| cell2location continuous association | Malignant_HER2_SC                                   | pooled continuous attention      |        |       |           |          | 0.0350746       | 5.834e-07  | 1.860e-06  | positive with attention                            | Fig. 4j; continuous attention-cell-state association |
| cell2location continuous association | Malignant_LumA_SC                                   | pooled continuous attention      |        |       |           |          | 0.0766869       | 2.454e-17  | 6.258e-16  | positive with attention                            | Fig. 4j; continuous attention-cell-state association |
| cell2location continuous association | Monocyte_DC                                         | pooled continuous attention      |        |       |           |          | -0.0794706      | 1.930e-17  | 6.258e-16  | negative with attention                            | Fig. 4j; continuous attention-cell-state association |
| cell2location continuous association | Plasmablasts                                        | pooled continuous attention      |        |       |           |          | -0.062936       | 2.655e-10  | 1.354e-09  | negative with attention                            | Fig. 4j; continuous attention-cell-state association |
| marker/module concordance            | Malignant_Cycling vs Proliferation                  | pooled marker/module correlation |        |       |           |          | 0.593108        | 0          | 0          | positive concordance                               | Supplementary Fig. 10; reference-marker support      |
| marker/module concordance            | Malignant_HER2_SC vs HER2_amplicon                  | pooled marker/module correlation |        |       |           |          | 0.510308        | 0          | 0          | positive concordance                               | Supplementary Fig. 10; reference-marker support      |
| marker/module concordance            | Malignant_LumA_SC vs Luminal                        | pooled marker/module correlation |        |       |           |          | 0.646605        | 0          | 0          | positive concordance                               | Supplementary Fig. 10; reference-marker support      |
